# Supplementary material
Source: publisher figshare collection journal article supplement (https://gsajournals.figshare.com/ndownloader/files/22247610)
Supplement: Supplementary file 1 [file 22247610]

"#Supplementary Table S5. Differentially expressed genes in myc2/3/4 at 49h treatment between high and low R/FR within genotype, and between Col and myc2/3/4 at P < 0.05.",,,,,,,,,
,gene_id,logFC.gtmyc234,logFC.gtmyc234.trtL,logCPM,LR,PValue,FDR,description,name
1,AT3G01345,-8.384127657,0.449040021,6.283336123,4591.238323,0,0, Expressed protein ,NA
2,AT1G16410,-7.630205609,-0.060583411,6.849390033,1178.760068,1.09E-256,9.40E-253, cytochrome p450 79f1 ,BUS1;CYP79F1;SPS1
3,AT2G43100,-5.167585336,-0.611573403,6.877658734,1160.468314,1.02E-252,5.88E-249, isopropylmalate isomerase 2 ,ATLEUD1;IPMI2
4,AT5G23010,-4.018525298,-1.003563586,7.05479934,1014.959048,4.02E-221,1.74E-217, methylthioalkylmalate synthase 1 ,GSM1;IMS3;MAM1
5,AT3G19710,-7.229387209,0.661154937,5.752538685,981.5365398,7.28E-214,2.52E-210, branched-chain aminotransferase4 ,BCAT4
6,AT5G14200,-4.398250645,-0.658757315,6.630083742,921.0167742,1.01E-200,2.91E-197, isopropylmalate dehydrogenase 1 ,ATIMD1;IMD1
7,AT4G13770,-4.493061122,-0.486303441,6.631434588,876.6364823,4.37E-191,1.08E-187," cytochrome P450, family 83, subfamily A, polypeptide 1 ",CYP83A1;REF2
8,AT2G30860,-3.262907935,-0.454106407,8.470223043,854.9135469,2.28E-186,4.94E-183, glutathione S-transferase PHI 9 ,ATGSTF7;ATGSTF9;GLUTTR;GSTF9
9,AT3G02020,-6.699257771,0.619535449,5.182141603,823.9247425,1.22E-179,2.35E-176, aspartate kinase 3 ,AK3
10,AT3G58990,-6.727184353,-0.496197566,5.52317348,723.1842962,9.17E-158,1.59E-154, isopropylmalate isomerase 1 ,IPMI1
11,AT2G25450,-3.136399769,-0.349343066,6.598305656,715.5122267,4.25E-156,6.70E-153, 2-oxoglutarate (2OG) and Fe(II)-dependent oxygenase superfamily protein ,NA
12,AT4G39940,-6.00259527,0.233592471,4.918390777,692.9222941,3.42E-151,4.94E-148, APS-kinase 2 ,AKN2;APK2
13,AT1G18590,-5.912419618,-1.52186591,4.701219919,628.1000231,4.07E-137,5.43E-134, sulfotransferase 17 ,ATSOT17;ATST5C;SOT17
14,AT4G31500,-4.925217615,-1.127909812,5.054284274,537.5810202,1.84E-117,2.28E-114," cytochrome P450, family 83, subfamily B, polypeptide 1 ",ATR4;CYP83B1;RED1;RNT1;SUR2
15,AT3G54600,-3.756664108,0.251992141,4.974293682,484.5677145,5.99E-106,6.92E-103, Class I glutamine amidotransferase-like superfamily protein ,DJ-1f;DJ1F
16,AT1G78370,-2.211842971,-0.114838177,8.359050755,441.8703954,1.12E-96,1.21E-93, glutathione S-transferase TAU 20 ,ATGSTU20;GSTU20
17,AT2G14750,-2.47214909,-0.12334418,5.736737413,433.2808614,8.21E-95,8.37E-92, APS kinase ,AKN1;APK;APK1;ATAKN1
18,AT4G04610,-3.153330142,-0.381233967,5.775409296,386.4187133,1.23E-84,1.19E-81, APS reductase 1 ,APR;APR1;ATAPR1;PRH19
19,AT4G14040,-1.910998554,-0.301685112,5.695573331,355.1916139,7.43E-78,6.78E-75, selenium-binding protein 2 ,EDA38;SBP2
20,AT1G24100,-2.637386824,0.052972435,7.726816503,351.0015542,6.04E-77,5.23E-74, UDP-glucosyl transferase 74B1 ,UGT74B1
21,AT1G74090,-2.062085442,-0.293447953,6.513912488,346.4569705,5.86E-76,4.83E-73, desulfo-glucosinolate sulfotransferase 18 ,ATSOT18;ATST5B;SOT18
22,AT4G12030,-4.085145551,0.335543095,3.64448972,342.797836,3.65E-75,2.88E-72, bile acid transporter 5 ,BASS5;BAT5
23,AT4G03060,-2.956294583,-0.304638587,4.678241618,332.6232273,5.91E-73,4.45E-70," AOP2 (ALKENYL HYDROXALKYL PRODUCING 2); oxidoreductase, acting on paired donors, with incorporation or reduction of molecular oxygen, 2-oxoglutarate as one donor, and incorporation of one atom each of oxygen into both donors ",AOP2
24,AT2G20610,-1.846789826,-0.033053235,5.858740044,304.0238253,9.60E-67,6.93E-64, Tyrosine transaminase family protein ,ALF1;HLS3;RTY;RTY1;SUR1
25,AT1G65860,-4.681672737,-0.907203384,2.654856034,295.5245595,6.72E-65,4.66E-62, flavin-monooxygenase glucosinolate S-oxygenase 1 ,FMO GS-OX1
26,AT1G62560,-3.809960286,0.222580639,4.215092202,294.4099125,1.17E-64,7.82E-62, flavin-monooxygenase glucosinolate S-oxygenase 3 ,FMO GS-OX3
27,AT3G22210,-1.453189135,0.097091742,6.653077476,293.4352348,1.91E-64,1.23E-61, unknown protein; FUNCTIONS IN: molecular_function unknown; INVOLVED IN: biological_process unknown; LOCATED IN: endomembrane system; EXPRESSED IN: 21 plant structures; EXPRESSED DURING: 13 growth stages; Has 26 Blast hits to 26 proteins in 13 species: Archae - 0; Bacteria - 0; Metazoa - 0; Fungi - 0; Plants - 26; Viruses - 0; Other Eukaryotes - 0 (source: NCBI BLink). ,NA
28,AT3G22740,-6.800330041,-0.535351499,3.145767778,291.981736,3.95E-64,2.45E-61, homocysteine S-methyltransferase 3 ,HMT3
29,AT1G74100,-1.918676834,-0.039323438,5.987496257,252.1260222,1.78E-55,1.07E-52, sulfotransferase 16 ,ATSOT16;ATST5A;CORI-7;SOT16
30,AT2G46650,-4.565922342,-1.279113175,3.452367931,241.4371978,3.74E-53,2.16E-50, cytochrome B5 isoform C ,ATCB5-C;B5 #1;CB5-C;CYTB5-C
31,AT3G26460,4.108848174,-1.48039635,2.455122642,230.9777684,6.98E-51,3.90E-48, Polyketide cyclase/dehydrase and lipid transport superfamily protein ,NA
32,AT4G39950,-7.103533077,-1.674229335,3.122668944,227.0203042,5.05E-50,2.73E-47," cytochrome P450, family 79, subfamily B, polypeptide 2 ",CYP79B2
33,AT2G22330,-5.873690804,0.159337569,3.613571856,191.7508344,2.30E-42,1.21E-39," cytochrome P450, family 79, subfamily B, polypeptide 3 ",CYP79B3
34,AT3G14210,1.297616715,-0.237624486,7.710895583,186.085096,3.91E-41,1.99E-38, epithiospecifier modifier 1 ,ESM1
35,AT5G44720,-1.421239085,-0.165038489,6.051743122,179.7426707,9.32E-40,4.61E-37, Molybdenum cofactor sulfurase family protein ,NA
36,AT3G23570,-2.083871624,0.125933417,3.272444367,141.3902545,1.98E-31,9.55E-29, alpha/beta-Hydrolases superfamily protein ,NA
37,AT5G35935,4.324766335,1.099561351,2.620644684,130.7136296,4.13E-29,1.93E-26, transposable element gene ,NA
38,AT4G30530,-1.616141025,-0.327674338,6.828589643,123.625967,1.43E-27,6.52E-25, Class I glutamine amidotransferase-like superfamily protein ,GGP1
39,AT5G01500,-0.992223218,-0.417731634,4.121076143,123.3610158,1.63E-27,7.25E-25, thylakoid ATP/ADP carrier ,TAAC
40,AT2G38860,-1.212788907,-0.125259706,4.78746068,119.3133779,1.23E-26,5.35E-24, Class I glutamine amidotransferase-like superfamily protein ,DJ-1e;DJ1E;YLS5
41,AT5G43500,1.092461974,-0.107596693,4.237090239,118.7264019,1.66E-26,7.00E-24, actin-related protein 9 ,ARP9;ATARP9
42,AT2G29450,-0.766431988,0.008547371,7.323259386,117.789051,2.65E-26,1.09E-23, glutathione S-transferase tau  5 ,AT103-1A;ATGSTU1;ATGSTU5;GSTU5
43,AT5G07700,-4.255420492,0.697225001,1.504046299,117.6057123,2.90E-26,1.17E-23, myb domain protein 76 ,AtMYB76;MYB76
44,AT1G52030,-6.469898408,0.129290809,2.273744926,116.6214804,4.74E-26,1.87E-23, myrosinase-binding protein 2 ,F-ATMBP;MBP1.2;MBP2
45,AT2G31790,-1.287910071,0.017634348,7.43017238,116.5247792,4.98E-26,1.92E-23, UDP-Glycosyltransferase superfamily protein ,NA
46,AT5G07460,-1.783381104,0.034234519,3.460537768,111.6377205,5.73E-25,2.16E-22, peptidemethionine sulfoxide reductase 2 ,ATMSRA2;PMSR2
47,AT1G52040,-2.515852768,-1.953772045,2.57219403,110.8086081,8.67E-25,3.20E-22, myrosinase-binding protein 1 ,ATMBP;MBP1
48,AT4G17880,-1.19392556,-0.126241344,4.139966917,100.8405596,1.27E-22,4.57E-20, Basic helix-loop-helix (bHLH) DNA-binding family protein ,MYC4
49,AT1G14250,-3.263160981,-1.019036632,5.291488421,99.29060889,2.75E-22,9.72E-20, GDA1/CD39 nucleoside phosphatase family protein ,NA
50,AT4G14680,-1.415136661,-0.24977022,3.899415157,98.77789115,3.55E-22,1.23E-19, Pseudouridine synthase/archaeosine transglycosylase-like family protein ,APS3;ATPS3
51,AT1G52000,-2.436037775,0.048003208,4.502630343,95.88952362,1.51E-21,5.12E-19, Mannose-binding lectin superfamily protein ,NA
52,AT1G16400,-6.614322977,0.31547843,1.085931538,92.55910464,7.96E-21,2.65E-18," cytochrome P450, family 79, subfamily F, polypeptide 2 ",CYP79F2
53,AT3G28220,-1.091264355,-0.575647025,5.578823517,91.2622041,1.52E-20,4.98E-18, TRAF-like family protein ,NA
54,AT3G63160,-0.967548172,0.085235467,8.227074553,90.16433111,2.64E-20,8.46E-18," FUNCTIONS IN: molecular_function unknown; INVOLVED IN: biological_process unknown; LOCATED IN: chloroplast outer membrane, thylakoid, chloroplast thylakoid membrane, chloroplast, chloroplast envelope; EXPRESSED IN: 21 plant structures; EXPRESSED DURING: 13 growth stages; BEST Arabidopsis thaliana protein match is: outer envelope membrane protein 7 (TAIR:AT3G52420.1); Has 26 Blast hits to 26 proteins in 8 species: Archae - 0; Bacteria - 0; Metazoa - 0; Fungi - 0; Plants - 26; Viruses - 0; Other Eukaryotes - 0 (source: NCBI BLink). ",OEP6
55,AT1G18710,1.976321328,1.254003333,2.919323788,87.87348182,8.29E-20,2.61E-17, myb domain protein 47 ,AtMYB47;MYB47
56,AT2G15960,-1.398027035,0.099499525,5.987552923,87.03519381,1.26E-19,3.90E-17, unknown protein; Has 14 Blast hits to 14 proteins in 5 species: Archae - 0; Bacteria - 0; Metazoa - 0; Fungi - 0; Plants - 14; Viruses - 0; Other Eukaryotes - 0 (source: NCBI BLink). ,NA
57,AT1G22340,-4.058919491,-1.944213662,1.223601147,86.55557471,1.60E-19,4.87E-17, UDP-glucosyl transferase 85A7 ,AtUGT85A7;UGT85A7
58,AT1G27565,5.006824655,3.547410786,1.822120765,86.15198805,1.96E-19,5.86E-17, unknown protein; FUNCTIONS IN: molecular_function unknown; INVOLVED IN: biological_process unknown; LOCATED IN: cellular_component unknown; BEST Arabidopsis thaliana protein match is: unknown protein (TAIR:AT1G52905.1); Has 3 Blast hits to 3 proteins in 1 species: Archae - 0; Bacteria - 0; Metazoa - 0; Fungi - 0; Plants - 3; Viruses - 0; Other Eukaryotes - 0 (source: NCBI BLink). ,NA
59,AT4G30140,-2.107365057,0.21072016,3.623933335,85.93770072,2.18E-19,6.41E-17, GDSL-like Lipase/Acylhydrolase superfamily protein ,CDEF1
60,AT3G22890,-0.831343914,-0.358146345,6.628511736,85.86349328,2.26E-19,6.54E-17, ATP sulfurylase 1 ,APS1;ATPS1
61,AT5G61420,0.825949522,-0.013872176,5.220697739,85.75883134,2.39E-19,6.78E-17, myb domain protein 28 ,AtMYB28;HAG1;MYB28;PMG1
62,AT5G44620,2.239307702,-0.416979073,1.828747034,85.08885716,3.34E-19,9.32E-17," cytochrome P450, family 706, subfamily A, polypeptide 3 ",CYP706A3
63,AT1G69120,4.598192011,0.023767524,0.250027467,77.32773309,1.62E-17,4.45E-15, K-box region and MADS-box transcription factor family protein  ,AGL7;AP1;AtAP1
64,AT5G54390,-0.76777747,-0.103796136,5.799690815,77.16017103,1.76E-17,4.76E-15, HAL2-like ,AHL;ATAHL;HL
65,AT1G62800,-2.997140549,0.837694229,1.664872609,75.48987205,4.05E-17,1.08E-14, aspartate aminotransferase 4 ,ASP4
66,AT5G15970,-1.700374779,0.042793179,6.138946001,74.56479639,6.43E-17,1.69E-14, stress-responsive protein (KIN2) / stress-induced protein (KIN2) / cold-responsive protein (COR6.6) / cold-regulated protein (COR6.6) ,AtCor6.6;COR6.6;KIN2
67,AT1G50732,-1.079281587,0.198851129,4.210941721,73.95693137,8.72E-17,2.25E-14, unknown protein. ,NA
68,AT5G42250,-1.361808894,0.37652067,4.153810324,72.95492006,1.44E-16,3.67E-14, Zinc-binding alcohol dehydrogenase family protein ,NA
69,AT3G05730,-0.560770283,-0.085245704,6.495377149,71.88220697,2.46E-16,6.18E-14, Encodes a defensin-like (DEFL) family protein. ,NA
70,AT2G39330,-3.778788144,-1.335308507,2.502435829,71.32146275,3.26E-16,8.06E-14, jacalin-related lectin 23 ,JAL23
71,AT5G48490,-1.620817987,0.07794146,4.20006569,69.98971619,6.34E-16,1.55E-13, Bifunctional inhibitor/lipid-transfer protein/seed storage 2S albumin superfamily protein ,DIR1-like
72,AT4G16870,0.850859175,0.126193841,6.800126187,68.18665681,1.56E-15,3.76E-13, transposable element gene ,NA
73,AT4G21630,-6.505288241,0.671551743,-0.078566924,66.98415411,2.85E-15,6.76E-13, Subtilase family protein ,NA
74,AT3G20100,1.358499967,0.204986573,2.164223298,66.48158384,3.66E-15,8.57E-13," cytochrome P450, family 705, subfamily A, polypeptide 19 ",CYP705A19
75,AT3G26470,3.713073829,-0.288971093,0.868425831,66.41860761,3.78E-15,8.73E-13," Powdery mildew resistance protein,  RPW8 domain ",NA
76,AT5G44630,4.606726017,-1.271302113,0.368455374,64.40084019,1.04E-14,2.36E-12, Terpenoid cyclases/Protein prenyltransferases superfamily protein ,NA
77,AT1G32900,0.878148432,0.187064637,5.000944875,63.32478751,1.77E-14,3.99E-12, UDP-Glycosyltransferase superfamily protein ,GBSS1
78,AT4G34400,1.582488316,-0.048505479,2.804785092,63.05975103,2.03E-14,4.50E-12, AP2/B3-like transcriptional factor family protein ,NA
79,AT5G10180,-0.725513495,-0.089935868,6.322478491,61.74359084,3.91E-14,8.58E-12, slufate transporter 2;1 ,AST68;SULTR2;1
80,AT5G26600,-0.807060634,0.025630703,4.872781732,60.82365035,6.20E-14,1.34E-11, Pyridoxal phosphate (PLP)-dependent transferases superfamily protein ,NA
81,AT4G12550,-2.262176788,0.156785162,2.246658999,60.78171649,6.33E-14,1.35E-11, Auxin-Induced in Root cultures 1 ,AIR1
82,AT1G20390,-1.323923964,0.070377157,3.917864746,60.6180416,6.87E-14,1.45E-11, transposable element gene ,NA
83,AT3G08590,0.595008817,-0.149332468,6.416043069,60.47292477,7.39E-14,1.54E-11," Phosphoglycerate mutase, 2,3-bisphosphoglycerate-independent ",iPGAM2
84,AT3G49680,-0.422863903,-0.269934795,6.756870688,59.91570901,9.76E-14,2.01E-11, branched-chain aminotransferase 3 ,ATBCAT-3;BCAT3
85,AT4G10060,-0.461801797,-0.033974797,7.61013703,59.80677675,1.03E-13,2.10E-11," Beta-glucosidase, GBA2 type family protein ",NA
86,AT4G35160,1.444708351,0.468156005,2.134169496,59.35868008,1.29E-13,2.60E-11, O-methyltransferase family protein ,ASMT
87,AT5G06870,-1.701077841,-0.259961935,4.057055343,58.43298346,2.05E-13,4.08E-11, polygalacturonase inhibiting protein 2 ,ATPGIP2;PGIP2
88,AT2G01755,-0.623405986,-0.083314124,4.551226153,58.28435164,2.21E-13,4.34E-11, unknown protein; FUNCTIONS IN: molecular_function unknown; INVOLVED IN: biological_process unknown; LOCATED IN: chloroplast; Has 120 Blast hits to 120 proteins in 52 species: Archae - 0; Bacteria - 80; Metazoa - 0; Fungi - 0; Plants - 24; Viruses - 0; Other Eukaryotes - 16 (source: NCBI BLink). ,NA
89,AT4G27560,-0.735291946,0.165073416,6.667143711,58.11971584,2.40E-13,4.66E-11, UDP-Glycosyltransferase superfamily protein ,UGT79B2
90,AT5G19740,0.542239121,0.465370536,4.331042551,56.73909652,4.78E-13,9.20E-11, Peptidase M28 family protein ,LAMP1
91,AT1G60260,-1.038017193,0.160591494,3.730552754,55.41372755,9.27E-13,1.77E-10, beta glucosidase 5 ,BGLU5
92,AT4G37410,-4.128497911,1.00598398,3.149858709,55.22308222,1.02E-12,1.92E-10," cytochrome P450, family 81, subfamily F, polypeptide 4 ",CYP81F4
93,AT1G67750,0.674992273,-0.186810407,5.385398284,55.13733423,1.06E-12,1.98E-10, Pectate lyase family protein ,NA
94,AT3G03190,-2.856502507,0.34211795,1.579960056,54.80774951,1.26E-12,2.29E-10, glutathione S-transferase F11 ,ATGSTF11;ATGSTF6;GSTF11
95,AT4G18960,3.370070734,-0.703311353,0.512783907,54.8074469,1.26E-12,2.29E-10, K-box region and MADS-box transcription factor family protein  ,AG
96,AT1G52410,-1.111789341,-0.37630523,5.497614704,54.72035617,1.31E-12,2.37E-10, TSK-associating protein 1 ,AtTSA1;TSA1
97,AT4G37560,0.818364796,-0.146151058,3.933125741,54.48609106,1.47E-12,2.63E-10, Acetamidase/Formamidase family protein ,NA
98,AT4G00380,0.861122979,-0.275670498,4.021202079,54.34857876,1.58E-12,2.79E-10, XH/XS domain-containing protein ,FDM2;IDP2;INDL2
99,AT4G34138,-0.728244575,-0.052590811,5.690468437,53.89838683,1.98E-12,3.46E-10, UDP-glucosyl transferase 73B1 ,UGT73B1
100,AT5G45950,0.485696282,-0.08568472,6.110627446,53.83019692,2.05E-12,3.55E-10, GDSL-like Lipase/Acylhydrolase superfamily protein ,NA
101,AT2G43530,-2.193301638,0.987980341,3.014704955,53.48316763,2.43E-12,4.18E-10, Scorpion toxin-like knottin superfamily protein ,NA
102,AT3G54500,0.575170829,-0.03942726,7.510963559,53.33292996,2.62E-12,4.46E-10, FUNCTIONS IN: molecular_function unknown; INVOLVED IN: biological_process unknown; LOCATED IN: cellular_component unknown; EXPRESSED IN: 22 plant structures; EXPRESSED DURING: 13 growth stages; BEST Arabidopsis thaliana protein match is: dentin sialophosphoprotein-related (TAIR:AT5G64170.1). ,LNK2
103,AT3G25770,-1.618410769,-0.234873474,4.636572629,53.28921816,2.68E-12,4.51E-10, allene oxide cyclase 2 ,AOC2
104,AT4G21990,-0.830101575,-0.220239603,5.062935432,52.80141468,3.42E-12,5.70E-10, APS reductase 3 ,APR3;ATAPR3;PRH-26;PRH26
105,AT4G04830,-4.113295148,0.102111772,1.137119761,52.42364412,4.13E-12,6.82E-10, methionine sulfoxide reductase B5 ,ATMSRB5;MSRB5
106,AT2G43910,-0.744858293,0.259385649,5.659206983,52.27737052,4.45E-12,7.27E-10, HARMLESS TO OZONE LAYER 1 ,ATHOL1;HOL1
107,AT3G23480,-1.899569286,-0.113659223,1.730865635,51.139003,7.86E-12,1.27E-09, Cyclopropane-fatty-acyl-phospholipid synthase ,NA
108,AT4G32280,-0.164367009,-3.735885013,1.014049511,51.10923452,7.98E-12,1.28E-09, indole-3-acetic acid inducible 29 ,IAA29
109,AT1G09415,-0.755716227,-0.213069391,5.183754915,50.36710131,1.16E-11,1.84E-09, NIM1-interacting 3 ,NIMIN-3
110,AT1G72810,0.695193957,-0.1353413,5.567632961,49.92791247,1.44E-11,2.27E-09, Pyridoxal-5'-phosphate-dependent enzyme family protein ,NA
111,AT5G46760,-0.550294855,0.056275892,6.445881825,49.62096805,1.68E-11,2.62E-09, Basic helix-loop-helix (bHLH) DNA-binding family protein ,MYC3
112,AT4G18440,-0.684212919,-0.589983986,6.82052627,49.52469992,1.76E-11,2.73E-09, L-Aspartase-like family protein ,NA
113,AT1G21440,-0.934604746,-0.120742858,6.430778234,49.29434142,1.98E-11,3.03E-09, Phosphoenolpyruvate carboxylase family protein ,NA
114,AT2G32150,-1.010366351,0.196423029,3.620606323,48.38378304,3.12E-11,4.74E-09, Haloacid dehalogenase-like hydrolase (HAD) superfamily protein ,NA
115,AT5G01015,-1.04324014,0.068060569,4.449584512,48.23646476,3.35E-11,5.05E-09, unknown protein; FUNCTIONS IN: molecular_function unknown; INVOLVED IN: biological_process unknown; LOCATED IN: endomembrane system; EXPRESSED IN: 23 plant structures; EXPRESSED DURING: 13 growth stages; BEST Arabidopsis thaliana protein match is: unknown protein (TAIR:AT1G65295.1); Has 30201 Blast hits to 17322 proteins in 780 species: Archae - 12; Bacteria - 1396; Metazoa - 17338; Fungi - 3422; Plants - 5037; Viruses - 0; Other Eukaryotes - 2996 (source: NCBI BLink). ,NA
116,AT1G27480,-0.561129933,0.009766266,4.942759973,47.77719345,4.22E-11,6.30E-09, alpha/beta-Hydrolases superfamily protein ,NA
117,AT3G11120,-0.920999109,-0.058241495,9.372704184,47.39692402,5.10E-11,7.56E-09, Ribosomal protein L41 family ,NA
118,AT3G25717,-0.220555449,-0.696274418,4.65720401,47.31475313,5.32E-11,7.81E-09, ROTUNDIFOLIA like 16 ,DVL6;RTFL16
119,AT5G24660,-0.864071462,-0.380177965,4.237916435,46.64812531,7.42E-11,1.08E-08, response to low sulfur 2 ,LSU2
120,AT4G32340,-0.704303164,-0.226075538,5.919092477,46.19631757,9.30E-11,1.34E-08, Tetratricopeptide repeat (TPR)-like superfamily protein ,NA
121,AT1G31690,-0.690737393,0.107932734,5.510787915,46.15762988,9.48E-11,1.36E-08, Copper amine oxidase family protein ,NA
122,AT1G07050,-1.398718424,0.662878804,4.400487461,45.87683706,1.09E-10,1.55E-08, CCT motif family protein ,FITNESS
123,AT1G52905,-1.39389184,-0.054332939,2.887339934,45.8657248,1.10E-10,1.55E-08, unknown protein; BEST Arabidopsis thaliana protein match is: unknown protein (TAIR:AT1G27565.1); Has 35333 Blast hits to 34131 proteins in 2444 species: Archae - 798; Bacteria - 22429; Metazoa - 974; Fungi - 991; Plants - 531; Viruses - 0; Other Eukaryotes - 9610 (source: NCBI BLink). ,NA
124,AT4G11320,0.940381086,0.184052529,5.773180787,45.53400737,1.30E-10,1.81E-08, Papain family cysteine protease ,AtCP2;CP2
125,AT4G16146,-1.626248199,0.575160218,3.830829935,44.76985274,1.90E-10,2.63E-08, cAMP-regulated phosphoprotein 19-related protein ,NA
126,AT4G12830,-0.694003092,-0.088795676,4.081417297,44.67874974,1.99E-10,2.73E-08, alpha/beta-Hydrolases superfamily protein ,NA
127,AT1G72645,-0.998397262,0.109834532,4.367523248,44.18274348,2.55E-10,3.47E-08, unknown protein; FUNCTIONS IN: molecular_function unknown; INVOLVED IN: biological_process unknown; LOCATED IN: endomembrane system; Has 35333 Blast hits to 34131 proteins in 2444 species: Archae - 798; Bacteria - 22429; Metazoa - 974; Fungi - 991; Plants - 531; Viruses - 0; Other Eukaryotes - 9610 (source: NCBI BLink). ,NA
128,AT3G47860,-0.444546268,-0.114747829,6.158554356,44.0453259,2.73E-10,3.69E-08, chloroplastic lipocalin ,CHL;LCNP
129,AT1G73600,0.722988973,-0.227470172,7.486582286,43.71353459,3.22E-10,4.32E-08, S-adenosyl-L-methionine-dependent methyltransferases superfamily protein ,AtPMT3;NMT;NMT3
130,AT1G55960,0.616005547,-0.089210725,5.544421316,43.41955065,3.73E-10,4.97E-08, Polyketide cyclase/dehydrase and lipid transport superfamily protein ,NA
131,AT3G21260,-1.591550577,0.077643522,2.031950078,43.289683,3.98E-10,5.19E-08, Glycolipid transfer protein (GLTP) family protein ,GLTP3
132,AT5G63980,-0.739444452,-0.022143413,5.764761383,43.2886426,3.98E-10,5.19E-08, Inositol monophosphatase family protein ,ALX8;AtFRY1;ATSAL1;FRY1;HOS2;RON1;SAL1;SUPO1
133,AT4G21760,1.540877611,-0.608094699,2.596862607,43.28676928,3.98E-10,5.19E-08, beta-glucosidase 47 ,BGLU47
134,AT5G37300,1.590891146,-0.61185928,2.818007915,42.97198524,4.66E-10,6.03E-08, O-acyltransferase (WSD1-like) family protein ,WSD1
135,AT3G09160,-1.966583302,-1.475499902,0.868514332,42.9492173,4.72E-10,6.05E-08, RNA-binding (RRM/RBD/RNP motifs) family protein ,NA
136,AT5G23240,-1.405402082,-0.28527504,3.192833522,42.04492892,7.41E-10,9.45E-08, DNAJ heat shock N-terminal domain-containing protein ,AtDjC17;DJC76
137,AT2G43900,0.465644716,-0.129957211,5.74321906,41.86485649,8.11E-10,1.02E-07, Endonuclease/exonuclease/phosphatase family protein ,5PTase12
138,AT5G35740,-0.847768922,-0.112346716,3.654722894,41.85615557,8.15E-10,1.02E-07, Carbohydrate-binding X8 domain superfamily protein ,NA
139,AT5G25130,-1.012792357,-0.187064682,3.181213439,41.71147014,8.76E-10,1.09E-07," cytochrome P450, family 71, subfamily B, polypeptide 12 ",CYP71B12
140,AT4G12310,-0.675877657,-0.58409439,3.911043309,41.58959585,9.31E-10,1.15E-07," cytochrome P450, family 706, subfamily A, polypeptide 5 ",CYP706A5
141,AT5G44580,-1.356806665,-1.397660901,2.028270482,41.50912078,9.69E-10,1.19E-07, unknown protein; FUNCTIONS IN: molecular_function unknown; INVOLVED IN: biological_process unknown; LOCATED IN: endomembrane system; EXPRESSED IN: 18 plant structures; EXPRESSED DURING: 12 growth stages; BEST Arabidopsis thaliana protein match is: unknown protein (TAIR:AT5G44582.1); Has 30201 Blast hits to 17322 proteins in 780 species: Archae - 12; Bacteria - 1396; Metazoa - 17338; Fungi - 3422; Plants - 5037; Viruses - 0; Other Eukaryotes - 2996 (source: NCBI BLink). ,NA
142,AT5G48250,-0.766616359,-0.016411825,3.917874375,41.35844773,1.05E-09,1.28E-07, B-box type zinc finger protein with CCT domain ,BBX8
143,AT2G34300,-0.639098282,0.087105264,5.849429172,40.73377509,1.43E-09,1.73E-07, S-adenosyl-L-methionine-dependent methyltransferases superfamily protein ,NA
144,AT5G64550,0.564047453,0.076380022,3.797389375,39.96984443,2.09E-09,2.50E-07, loricrin-related ,NA
145,AT5G64552,0.56404615,0.076381102,3.797389375,39.96786966,2.09E-09,2.50E-07, conserved peptide upstream open reading frame 22 ,NA
146,AT4G12917,-1.434918435,-0.410793988,1.900204452,39.8360765,2.24E-09,2.66E-07, other RNA ,NA
147,AT5G42650,-0.658835998,-0.531703437,6.103279317,39.79568348,2.28E-09,2.69E-07, allene oxide synthase ,AOS;CYP74A;DDE2
148,AT3G13790,-0.753982746,0.056852013,5.044199549,39.77763885,2.30E-09,2.70E-07, Glycosyl hydrolases family 32 protein ,ATBFRUCT1;AtCWI1;ATCWINV1;CWI1
149,AT5G16370,-0.700701547,-0.076698562,3.849229654,39.62433034,2.49E-09,2.89E-07, acyl activating enzyme 5 ,AAE5
150,AT5G54250,-0.510978366,-0.169122779,4.964020916,39.61045808,2.50E-09,2.89E-07, cyclic nucleotide-gated cation channel 4 ,ATCNGC4;CNGC4;DND2;HLM1
151,AT1G13650,-0.549979577,-0.168429495,6.792943876,39.56929093,2.56E-09,2.93E-07, BEST Arabidopsis thaliana protein match is: 18S pre-ribosomal assembly protein gar2-related (TAIR:AT2G03810.4); Has 3688 Blast hits to 1629 proteins in 255 species: Archae - 22; Bacteria - 222; Metazoa - 684; Fungi - 292; Plants - 62; Viruses - 14; Other Eukaryotes - 2392 (source: NCBI BLink). ,NA
152,AT1G37130,0.726271849,-0.347624196,7.779947251,39.0314195,3.35E-09,3.81E-07, nitrate reductase 2 ,ATNR2;B29;CHL3;NIA2;NIA2-1;NR;NR2
153,AT4G25740,-0.85865137,0.336209333,5.856026969,38.94784834,3.49E-09,3.95E-07, RNA binding Plectin/S10 domain-containing protein ,NA
154,AT4G24275,-0.900166066,-0.178197782,3.569929111,38.78623763,3.78E-09,4.25E-07, Identified as a screen for stress-responsive genes. ,NA
155,AT4G13430,-0.420288274,-0.099393331,7.263671457,38.7758618,3.80E-09,4.25E-07, isopropyl malate isomerase large subunit 1 ,ATLEUC1;IIL1
156,AT1G01210,-0.916739053,0.369767086,4.332683543,38.73583708,3.88E-09,4.31E-07," DNA-directed RNA polymerase, subunit M, archaeal ",NA
157,AT2G46830,0.740814466,0.078775517,4.777417828,38.34425723,4.72E-09,5.21E-07, circadian clock associated 1 ,AtCCA1;CCA1
158,AT5G48485,0.919516471,-0.321076568,3.423972123,37.90486656,5.88E-09,6.44E-07, Bifunctional inhibitor/lipid-transfer protein/seed storage 2S albumin superfamily protein ,DIR1
159,AT4G13495,-0.459563609,-0.160530501,7.726687162,37.83170224,6.09E-09,6.64E-07, other RNA ,NA
160,AT5G24470,-1.013699994,0.107979882,5.876778282,37.75012825,6.35E-09,6.88E-07, pseudo-response regulator 5 ,APRR5;PRR5
161,AT1G23410,-1.045660194,0.476203177,4.925778377,37.61174828,6.80E-09,7.32E-07, Ribosomal protein S27a / Ubiquitin family protein ,NA
162,AT5G10550,0.368167578,0.130505314,6.362624724,37.40986779,7.53E-09,8.05E-07, global transcription factor group E2 ,GTE2
163,AT2G23120,-0.736874477,0.141417739,4.934504666,36.90333879,9.69E-09,1.03E-06," Late embryogenesis abundant protein, group 6 ",NA
164,AT2G41650,-0.93032709,0.23339603,4.730499103,36.83794798,1.00E-08,1.06E-06, unknown protein; FUNCTIONS IN: molecular_function unknown; INVOLVED IN: biological_process unknown; LOCATED IN: chloroplast; EXPRESSED IN: 22 plant structures; EXPRESSED DURING: 13 growth stages; Has 3 Blast hits to 3 proteins in 1 species: Archae - 0; Bacteria - 0; Metazoa - 0; Fungi - 0; Plants - 3; Viruses - 0; Other Eukaryotes - 0 (source: NCBI BLink). ,NA
165,AT1G06460,-0.614034731,-0.179546679,5.478057387,36.70627764,1.07E-08,1.12E-06, alpha-crystallin domain 32.1 ,ACD31.2;ACD32.1
166,AT2G45660,0.592489551,-0.138726055,5.054558446,36.64279106,1.10E-08,1.15E-06, AGAMOUS-like 20 ,AGL20;ATSOC1;SOC1
167,AT4G16860,0.552149536,-0.065932782,6.313486275,36.52348588,1.17E-08,1.22E-06, Disease resistance protein (TIR-NBS-LRR class) family ,RPP4
168,AT4G26670,-0.637057545,0.265143815,5.478565574,36.43079102,1.23E-08,1.27E-06, Mitochondrial import inner membrane translocase subunit Tim17/Tim22/Tim23 family protein ,HP20
169,AT2G22170,-0.561474982,0.117524618,4.915318428,36.41513609,1.24E-08,1.27E-06," Lipase/lipooxygenase, PLAT/LH2 family protein ",PLAT2
170,AT1G72770,0.511311692,-0.068941175,4.390506798,35.52972185,1.93E-08,1.96E-06, HYPERSENSITIVE TO ABA1 ,AtHAB1;HAB1
171,AT2G06050,-0.808729748,-0.30227752,5.33206667,35.2593413,2.21E-08,2.23E-06, oxophytodienoate-reductase 3 ,AtOPR3;DDE1;OPR3
172,AT1G10960,-0.27879898,-0.261532404,8.036025953,35.25423768,2.21E-08,2.23E-06, ferredoxin 1 ,ATFD1;FD1
173,AT5G02940,-0.410079742,-0.165848594,6.353658646,35.13396538,2.35E-08,2.35E-06, Protein of unknown function (DUF1012) ,NA
174,AT4G01525,1.334569343,-0.258846243,2.389628766,34.93982848,2.59E-08,2.58E-06, transposable element gene ,SADHU5-1
175,AT3G49120,0.784385139,-0.203591803,5.041599932,34.82754706,2.74E-08,2.71E-06, peroxidase CB ,ATPCB;ATPERX34;PERX34;PRX34;PRXCB
176,AT5G20630,-0.580962486,0.074298394,7.877451812,34.71274208,2.90E-08,2.85E-06, germin 3 ,ATGER3;GER3;GLP3;GLP3A;GLP3B
177,AT2G36145,0.4781677,-0.090666037,6.459511804,34.47339773,3.27E-08,3.20E-06," unknown protein; FUNCTIONS IN: molecular_function unknown; INVOLVED IN: biological_process unknown; LOCATED IN: chloroplast thylakoid membrane, chloroplast stroma, chloroplast; EXPRESSED IN: 19 plant structures; EXPRESSED DURING: 13 growth stages; Has 49 Blast hits to 49 proteins in 17 species: Archae - 0; Bacteria - 0; Metazoa - 0; Fungi - 0; Plants - 49; Viruses - 0; Other Eukaryotes - 0 (source: NCBI BLink). ",NA
178,AT1G04770,-1.052902239,-0.017172765,3.726070485,34.44372764,3.32E-08,3.23E-06, Tetratricopeptide repeat (TPR)-like superfamily protein ,SD!2
179,AT1G72640,0.372804897,-0.086786942,6.185737165,34.10936547,3.92E-08,3.79E-06, NAD(P)-binding Rossmann-fold superfamily protein ,NA
180,AT1G43670,-0.439751557,-0.013548354,7.120982514,34.02816349,4.08E-08,3.93E-06, Inositol monophosphatase family protein ,AtcFBP;cyfbp;FBP;FINS1
181,AT1G78090,1.919166365,-0.685687419,1.093399523,34.00371018,4.13E-08,3.96E-06, trehalose-6-phosphate phosphatase ,ATTPPB;TPPB
182,AT5G62140,-0.574399366,-0.049562269,4.417346674,33.44837939,5.45E-08,5.19E-06, unknown protein; FUNCTIONS IN: molecular_function unknown; INVOLVED IN: biological_process unknown; LOCATED IN: chloroplast; EXPRESSED IN: 19 plant structures; EXPRESSED DURING: 13 growth stages; Has 60 Blast hits to 60 proteins in 24 species: Archae - 0; Bacteria - 14; Metazoa - 0; Fungi - 0; Plants - 45; Viruses - 0; Other Eukaryotes - 1 (source: NCBI BLink). ,NA
183,AT4G33666,-1.329699162,-0.05294495,2.689869847,33.35329508,5.72E-08,5.40E-06, unknown protein; FUNCTIONS IN: molecular_function unknown; INVOLVED IN: biological_process unknown; LOCATED IN: chloroplast; EXPRESSED IN: 19 plant structures; EXPRESSED DURING: 11 growth stages; Has 30201 Blast hits to 17322 proteins in 780 species: Archae - 12; Bacteria - 1396; Metazoa - 17338; Fungi - 3422; Plants - 5037; Viruses - 0; Other Eukaryotes - 2996 (source: NCBI BLink). ,NA
184,AT1G20691,-0.872626362,0.131100362,3.233307661,33.3481672,5.74E-08,5.40E-06," Potential natural antisense gene, locus overlaps with AT1G20690 ",NA
185,AT3G47800,-0.451100901,-0.204410475,4.692230382,33.33831936,5.76E-08,5.40E-06, Galactose mutarotase-like superfamily protein ,NA
186,AT5G04590,-0.441896139,-0.090095038,7.791405356,33.27611999,5.95E-08,5.54E-06, sulfite reductase ,SIR
187,AT4G00895,-0.256718759,-0.174179249,6.853747896,33.21401927,6.13E-08,5.68E-06," ATPase, F1 complex, OSCP/delta subunit protein ",NA
188,AT1G18730,-0.382622228,-0.086929411,7.224909767,33.15036842,6.33E-08,5.84E-06, NDH dependent flow 6 ,NDF6;PnsB4
189,AT5G53880,-0.981589934,0.422490226,8.929655405,33.07124272,6.59E-08,6.04E-06," unknown protein; FUNCTIONS IN: molecular_function unknown; INVOLVED IN: biological_process unknown; LOCATED IN: mitochondrion, plasma membrane; EXPRESSED IN: 23 plant structures; EXPRESSED DURING: 13 growth stages; Has 30201 Blast hits to 17322 proteins in 780 species: Archae - 12; Bacteria - 1396; Metazoa - 17338; Fungi - 3422; Plants - 5037; Viruses - 0; Other Eukaryotes - 2996 (source: NCBI BLink). ",NA
190,AT4G22390,1.447831823,0.868760149,0.632064232,33.05751722,6.63E-08,6.05E-06, F-box associated ubiquitination effector family protein ,NA
191,AT3G62410,-0.674318911,-0.034612252,6.570560034,32.95920119,6.97E-08,6.32E-06, CP12 domain-containing protein 2 ,CP12;CP12-2
192,AT5G18040,0.834310286,-0.2830386,3.410965401,32.7202701,7.85E-08,7.08E-06, unknown protein; BEST Arabidopsis thaliana protein match is: unknown protein (TAIR:AT4G29760.1); Has 1807 Blast hits to 1807 proteins in 277 species: Archae - 0; Bacteria - 0; Metazoa - 736; Fungi - 347; Plants - 385; Viruses - 0; Other Eukaryotes - 339 (source: NCBI BLink). ,HTT2
193,AT1G04640,-0.4220558,-0.05816416,5.190934742,32.07992099,1.08E-07,9.71E-06, lipoyltransferase 2 ,LIP2
194,AT3G16420,0.771915803,-0.098050139,5.919188215,32.02380062,1.11E-07,9.93E-06, PYK10-binding protein 1 ,JAL30;PBP1;PBPI
195,AT5G62280,0.060083238,-1.698071799,2.051913662,31.87960264,1.20E-07,1.06E-05, Protein of unknown function (DUF1442) ,NA
196,AT2G39310,1.314437341,-1.01314329,3.271678768,31.79361382,1.25E-07,1.10E-05, jacalin-related lectin 22 ,JAL22
197,AT3G50685,-0.376014176,-0.02561446,6.02814286,31.7693961,1.26E-07,1.11E-05, unknown protein; Has 52 Blast hits to 46 proteins in 20 species: Archae - 0; Bacteria - 0; Metazoa - 0; Fungi - 0; Plants - 45; Viruses - 0; Other Eukaryotes - 7 (source: NCBI BLink). ,NA
198,AT1G21310,0.778157918,0.495143616,7.958323013,31.68094279,1.32E-07,1.16E-05, extensin 3 ,ATEXT3;EXT3;RSH
199,AT3G62550,-1.314942685,0.050617998,3.557766422,31.55467714,1.41E-07,1.22E-05, Adenine nucleotide alpha hydrolases-like superfamily protein ,NA
200,AT5G60890,0.713413256,0.016448204,4.029368459,31.51737928,1.43E-07,1.24E-05, myb domain protein 34 ,AtATR1;ATMYB34;ATR1;MYB34
201,AT3G03780,-0.467239207,-0.232826861,7.161574821,31.43171814,1.50E-07,1.29E-05, methionine synthase 2 ,ATMS2;MS2
202,AT1G70260,0.863868952,0.698348693,2.713299676,31.31648511,1.58E-07,1.36E-05, nodulin MtN21 /EamA-like transporter family protein ,RTP1;UMAMIT36
203,AT1G26945,-0.376150213,-0.498606713,5.53395312,31.2410459,1.64E-07,1.40E-05, basic helix-loop-helix (bHLH) DNA-binding superfamily protein ,KDR;PRE6
204,AT5G05730,-0.521331314,-0.078653932,5.050043984,31.20856426,1.67E-07,1.42E-05, anthranilate synthase alpha subunit 1 ,AMT1;ASA1;JDL1;TRP5;WEI2
205,AT2G36080,-1.077160588,-0.219528923,2.571678132,31.18905127,1.69E-07,1.43E-05, AP2/B3-like transcriptional factor family protein ,ABS2;NGAL1
206,AT1G12770,-0.408708852,0.020196434,7.275684853,31.12521048,1.74E-07,1.47E-05, P-loop containing nucleoside triphosphate hydrolases superfamily protein ,EMB1586;ISE1
207,AT2G42570,0.464473273,-0.000900086,4.571404497,30.98146488,1.87E-07,1.57E-05, TRICHOME BIREFRINGENCE-LIKE 39 ,TBL39
208,AT4G21650,0.758992607,0.065398184,5.008912523,30.92280382,1.93E-07,1.61E-05, Subtilase family protein ,SBT3.13
209,AT1G30820,-0.610535788,0.055849022,5.601263647,30.90959208,1.94E-07,1.61E-05, CTP synthase family protein ,NA
210,AT1G58270,-0.764806853,0.350158249,4.571777663,30.8705018,1.98E-07,1.63E-05, TRAF-like family protein ,ZW9
211,AT3G53890,-0.280959389,-0.149131118,6.961952226,30.67344922,2.18E-07,1.79E-05, Ribosomal protein S21e  ,EVR1;RPS21B
212,AT2G26220,-1.94986502,0.335600075,1.111291759,30.57581146,2.29E-07,1.87E-05," pseudogene, similar to phosphoenolpyruvate/phosphate translocator precursor, similar to AraPPT, GB:U66321; blastp match of 88% identity and 4.2e-35 P-value to GP",NA
213,AT5G12050,-0.247214545,-0.543056958,4.619988976,30.55619747,2.32E-07,1.88E-05, unknown protein; BEST Arabidopsis thaliana protein match is: unknown protein (TAIR:AT3G13980.1); Has 1807 Blast hits to 1807 proteins in 277 species: Archae - 0; Bacteria - 0; Metazoa - 736; Fungi - 347; Plants - 385; Viruses - 0; Other Eukaryotes - 339 (source: NCBI BLink). ,BG1
214,AT5G56100,-0.498324587,-0.087489671,4.996570051,30.49157606,2.39E-07,1.94E-05, glycine-rich protein / oleosin ,NA
215,AT4G31610,1.23012477,0.649148291,1.631290316,30.22394486,2.73E-07,2.20E-05, Transcriptional factor B3 family protein ,ATREM1;REM1;REM34
216,AT4G29700,-1.502736697,0.285728031,3.30629194,30.21784984,2.74E-07,2.20E-05, Alkaline-phosphatase-like family protein ,NA
217,AT2G41220,0.345689795,0.017101329,6.112815391,30.09285839,2.92E-07,2.33E-05, glutamate synthase 2 ,GLU2
218,AT1G17420,0.806422925,-0.292210296,3.15365061,29.91672752,3.19E-07,2.53E-05, lipoxygenase 3 ,ATLOX3;LOX3
219,AT1G11580,-1.497618566,0.313059731,3.066094625,29.82764799,3.33E-07,2.64E-05, methylesterase PCR A ,ATPMEPCRA;PMEPCRA
220,AT3G16470,-0.909744458,-0.54798808,4.842034577,29.80052763,3.38E-07,2.66E-05, Mannose-binding lectin superfamily protein ,AtJAC1;JAL35;JR1
221,AT5G59540,-0.517516817,-0.508657752,3.411542224,29.7922116,3.39E-07,2.66E-05, 2-oxoglutarate (2OG) and Fe(II)-dependent oxygenase superfamily protein ,NA
222,AT3G28500,2.388322043,-1.132088729,1.582536772,29.78094205,3.41E-07,2.66E-05, 60S acidic ribosomal protein family ,NA
223,AT5G06690,-0.735996073,0.244122038,4.759885774,29.63413078,3.67E-07,2.85E-05, WCRKC thioredoxin 1 ,WCRKC1
224,AT2G42870,-1.052420436,0.447457929,3.1288271,29.54347784,3.84E-07,2.97E-05, phy rapidly regulated 1 ,HLH1;PAR1
225,AT3G16400,0.43969892,0.03130853,6.557706134,29.46569894,4.00E-07,3.08E-05, nitrile specifier protein 1 ,ATMLP-470;ATNSP1;NSP1
226,AT5G50450,-0.50098324,0.054460676,4.660547269,29.44791511,4.03E-07,3.09E-05, HCP-like superfamily protein with MYND-type zinc finger ,NA
227,AT4G22517,-1.300869147,0.371395958,3.745001569,29.44066842,4.05E-07,3.09E-05, Bifunctional inhibitor/lipid-transfer protein/seed storage 2S albumin superfamily protein ,NA
228,AT3G19000,-0.312212992,-0.352162837,4.371384984,29.37613958,4.18E-07,3.18E-05, 2-oxoglutarate (2OG) and Fe(II)-dependent oxygenase superfamily protein ,NA
229,AT3G58200,1.45709164,-0.481431997,1.782583196,29.27488758,4.40E-07,3.33E-05, TRAF-like family protein ,NA
230,AT2G31380,0.591162735,-0.224373078,4.786495756,29.10094097,4.80E-07,3.61E-05, salt tolerance homologue ,BBX25;STH
231,AT1G22400,-0.635298548,0.102543436,6.624485272,29.07122964,4.87E-07,3.65E-05, UDP-Glycosyltransferase superfamily protein ,ATUGT85A1;UGT85A1
232,AT1G68500,-2.334612673,1.040352287,1.320837336,29.0264828,4.98E-07,3.72E-05, unknown protein; BEST Arabidopsis thaliana protein match is: unknown protein (TAIR:AT1G25422.1); Has 16 Blast hits to 16 proteins in 6 species: Archae - 0; Bacteria - 0; Metazoa - 0; Fungi - 0; Plants - 16; Viruses - 0; Other Eukaryotes - 0 (source: NCBI BLink). ,NA
233,AT4G27300,0.875816217,0.03587946,3.512411121,28.96697681,5.13E-07,3.81E-05, S-locus lectin protein kinase family protein ,NA
234,AT3G06125,-1.191939254,-0.04743287,1.909182644,28.90755626,5.28E-07,3.91E-05, other RNA ,sORF22
235,AT5G54585,-0.613400045,-0.305738553,3.392041655,28.77212614,5.65E-07,4.17E-05, unknown protein; Has 30201 Blast hits to 17322 proteins in 780 species: Archae - 12; Bacteria - 1396; Metazoa - 17338; Fungi - 3422; Plants - 5037; Viruses - 0; Other Eukaryotes - 2996 (source: NCBI BLink). ,NA
236,AT4G12870,1.245896982,-0.004762004,1.631431672,28.65998312,5.98E-07,4.39E-05, Gamma interferon responsive lysosomal thiol (GILT) reductase family protein ,NA
237,AT4G04330,-1.090677733,-0.151000561,3.20028743,28.61294053,6.12E-07,4.47E-05, Chaperonin-like RbcX protein ,AtRbcX1;RbcX1
238,AT2G38870,-0.847543212,0.092719182,3.173142417,28.39893987,6.81E-07,4.96E-05," Serine protease inhibitor, potato inhibitor I-type family protein ",NA
239,AT4G10300,-0.417505519,-0.068787951,4.980664984,28.1029021,7.90E-07,5.73E-05, RmlC-like cupins superfamily protein ,TRR14
240,AT3G02380,0.677495672,0.007239255,3.854235982,27.80314474,9.18E-07,6.62E-05, CONSTANS-like 2 ,ATCOL2;BBX3;COL2
241,AT3G26450,-0.374110663,-0.079198263,6.399562117,27.76803182,9.34E-07,6.71E-05, Polyketide cyclase/dehydrase and lipid transport superfamily protein ,NA
242,AT3G55240,-0.577016448,-0.198600139,4.663314415,27.67786569,9.77E-07,6.99E-05, Plant protein 1589 of unknown function ,NA
243,AT1G24625,-0.783117526,0.61845955,4.480647936,27.55515698,1.04E-06,7.41E-05, zinc finger protein 7 ,ZFP7
244,AT1G61300,0.64242182,-0.21642018,5.109506346,27.38122616,1.13E-06,8.05E-05, LRR and NB-ARC domains-containing disease resistance protein ,NA
245,AT1G22890,-0.868641229,0.141343549,4.081051464,27.30529082,1.18E-06,8.32E-05, unknown protein; FUNCTIONS IN: molecular_function unknown; INVOLVED IN: biological_process unknown; LOCATED IN: endomembrane system; EXPRESSED IN: 19 plant structures; EXPRESSED DURING: 11 growth stages; Has 17 Blast hits to 17 proteins in 2 species: Archae - 0; Bacteria - 0; Metazoa - 0; Fungi - 0; Plants - 17; Viruses - 0; Other Eukaryotes - 0 (source: NCBI BLink). ,NA
246,AT3G22840,-0.809620766,-0.61477388,2.824079496,27.17854155,1.25E-06,8.83E-05, Chlorophyll A-B binding family protein ,ELIP;ELIP1
247,AT1G20510,-0.869264264,-0.087802493,4.393769202,27.01813764,1.36E-06,9.53E-05, OPC-8:0 CoA ligase1 ,OPCL1
248,AT5G57760,-0.991155362,-0.855944086,2.283092612,26.98326046,1.38E-06,9.66E-05, unknown protein; Has 5 Blast hits to 5 proteins in 2 species: Archae - 0; Bacteria - 0; Metazoa - 0; Fungi - 0; Plants - 5; Viruses - 0; Other Eukaryotes - 0 (source: NCBI BLink). ,NA
249,AT3G03630,-0.370219511,0.02711524,6.183120929,26.96246949,1.40E-06,9.72E-05, cysteine synthase 26 ,CS26
250,AT5G54810,-0.38308604,0.066288307,7.284886476,26.94467671,1.41E-06,9.77E-05, tryptophan synthase beta-subunit 1 ,ATTSB1;TRP2;TRPB;TSB1
251,AT3G05160,-0.509489194,-0.044348898,4.242040265,26.90118687,1.44E-06,9.94E-05, Major facilitator superfamily protein ,NA
252,AT2G46790,0.570608833,0.040266431,5.412633446,26.88516621,1.45E-06,9.98E-05, pseudo-response regulator 9 ,APRR9;PRR9;TL1
253,AT1G12570,0.434216347,0.745629047,2.386200709,26.7140002,1.58E-06,0.000108332, Glucose-methanol-choline (GMC) oxidoreductase family protein ,NA
254,AT5G40370,-0.151432973,-0.586382858,4.257831335,26.67313764,1.61E-06,0.000110133, Glutaredoxin family protein ,AtGRXC2;GRX370;GRXC2
255,AT2G29180,-0.3964523,0.108220535,7.896324631,26.62527064,1.65E-06,0.000112358, unknown protein; FUNCTIONS IN: molecular_function unknown; INVOLVED IN: biological_process unknown; LOCATED IN: chloroplast thylakoid membrane; EXPRESSED IN: 23 plant structures; EXPRESSED DURING: 13 growth stages; Has 34 Blast hits to 33 proteins in 16 species: Archae - 0; Bacteria - 0; Metazoa - 0; Fungi - 0; Plants - 33; Viruses - 0; Other Eukaryotes - 1 (source: NCBI BLink). ,NA
256,AT2G38740,1.024062569,-0.791142802,3.318298018,26.5698994,1.70E-06,0.000115061, Haloacid dehalogenase-like hydrolase (HAD) superfamily protein ,NA
257,AT1G53430,0.412292873,-0.079834622,5.487785594,26.55692744,1.71E-06,0.000115359, Leucine-rich repeat transmembrane protein kinase ,NILR2
258,AT4G13575,-0.506877684,-0.068887329,5.192350428,26.54467734,1.72E-06,0.000115618, unknown protein; FUNCTIONS IN: molecular_function unknown; INVOLVED IN: biological_process unknown; LOCATED IN: cellular_component unknown; Has 30201 Blast hits to 17322 proteins in 780 species: Archae - 12; Bacteria - 1396; Metazoa - 17338; Fungi - 3422; Plants - 5037; Viruses - 0; Other Eukaryotes - 2996 (source: NCBI BLink). ,NA
259,AT2G47260,0.43718032,0.646428603,3.075903975,26.51991846,1.74E-06,0.000116606, WRKY DNA-binding protein 23 ,ATWRKY23;WRKY23
260,AT2G34655,1.307767729,0.184448507,1.416333528,26.49919609,1.76E-06,0.000117367," unknown protein; FUNCTIONS IN: molecular_function unknown; INVOLVED IN: biological_process unknown; LOCATED IN: endomembrane system; EXPRESSED IN: stem, root, inflorescence, cultured cell, leaf; Has 35333 Blast hits to 34131 proteins in 2444 species: Archae - 798; Bacteria - 22429; Metazoa - 974; Fungi - 991; Plants - 531; Viruses - 0; Other Eukaryotes - 9610 (source: NCBI BLink). ",NA
261,AT2G47800,1.004349458,-0.767192076,3.596184318,26.48164148,1.78E-06,0.000117949, multidrug resistance-associated protein 4 ,ABCC4;ATMRP4;EST3;MRP4
262,AT2G43550,-0.976270276,0.086876312,4.029849302,26.39231715,1.86E-06,0.000122865, Scorpion toxin-like knottin superfamily protein ,NA
263,AT1G56690,-0.859785184,0.598647329,3.889701606,26.30767461,1.94E-06,0.000127689, Pentatricopeptide repeat (PPR) superfamily protein ,NA
264,AT4G23680,1.75558698,0.04119694,1.069476299,26.24524376,2.00E-06,0.000131057, Polyketide cyclase/dehydrase and lipid transport superfamily protein ,NA
265,AT3G12320,0.63019608,-0.10011573,5.451847043,26.24045662,2.00E-06,0.000131057, unknown protein; BEST Arabidopsis thaliana protein match is: unknown protein (TAIR:AT5G06980.4); Has 102 Blast hits to 102 proteins in 16 species: Archae - 0; Bacteria - 0; Metazoa - 0; Fungi - 0; Plants - 98; Viruses - 0; Other Eukaryotes - 4 (source: NCBI BLink). ,LNK3
266,AT1G74670,-0.598989469,-0.053982423,4.875342397,26.20430271,2.04E-06,0.000132946, Gibberellin-regulated family protein ,GASA6
267,AT1G18400,-0.949891521,-0.151911845,2.024907738,26.17698011,2.07E-06,0.00013427, BR enhanced expression 1 ,BEE1
268,AT4G28190,0.365615407,0.130369593,5.890996102,26.14958262,2.10E-06,0.000135614," Developmental regulator, ULTRAPETALA ",ULT;ULT1
269,AT3G63240,0.633795918,-0.09193037,3.811299491,25.9817345,2.28E-06,0.000146938, DNAse I-like superfamily protein ,NA
270,AT4G15620,-0.292538816,-0.136161822,5.301561974,25.94494054,2.32E-06,0.000149112, Uncharacterised protein family (UPF0497) ,CASPL1E2
271,AT1G48600,0.637750741,-0.079216987,6.745770548,25.7071394,2.62E-06,0.000167229, S-adenosyl-L-methionine-dependent methyltransferases superfamily protein ,AtPMEAMT;AtPMT2;PMEAMT
272,AT5G24780,-3.205148384,-0.797528943,2.905813189,25.70084635,2.63E-06,0.000167229, vegetative storage protein 1 ,ATVSP1;VSP1
273,AT1G01170,-0.584144144,-0.057069919,4.012981815,25.65251349,2.69E-06,0.000170692, Protein of unknown function (DUF1138) ,NA
274,AT1G02800,0.933142821,-0.321502244,3.42782616,25.5591541,2.82E-06,0.000178196, cellulase 2 ,ATCEL2;CEL2
275,AT4G34580,0.907474523,-0.185863252,3.110720932,25.2321648,3.32E-06,0.000209084, Sec14p-like phosphatidylinositol transfer family protein ,AtSFH1;COW1;SRH1
276,AT1G48100,0.493831174,0.354310272,2.948230692,25.17244758,3.42E-06,0.000214641, Pectin lyase-like superfamily protein ,PGX3
277,AT4G01026,-0.364698873,-0.612268528,3.669231602,24.80619149,4.11E-06,0.000256846, PYR1-like 7 ,PYL7;RCAR2
278,AT4G29190,-0.364613157,-0.815102707,2.935366716,24.78722437,4.14E-06,0.000258361, Zinc finger C-x8-C-x5-C-x3-H type family protein ,AtC3H49;AtOZF2;AtTZF3;OZF2;TZF3
279,AT1G18990,-1.416655467,-0.445612127,1.485906024,24.77350468,4.17E-06,0.000259207," Protein of unknown function, DUF593 ",NA
280,AT2G34060,-0.91396655,-0.125005236,2.962901242,24.70362772,4.32E-06,0.000267464, Peroxidase superfamily protein ,NA
281,AT2G39920,-0.569384614,0.03918885,4.121411796,24.69109735,4.35E-06,0.000268187," HAD superfamily, subfamily IIIB acid phosphatase  ",NA
282,AT3G20390,-0.332284034,-0.026659497,7.972284598,24.68237934,4.37E-06,0.000268404, endoribonuclease L-PSP family protein ,RidA
283,AT1G54820,-0.376792439,-0.322713347,4.238269834,24.65644153,4.43E-06,0.000270947, Protein kinase superfamily protein ,NA
284,AT3G15950,0.715921173,-0.419379921,4.740268409,24.60364551,4.54E-06,0.000277215, DNA topoisomerase-related ,NAI2
285,AT5G27290,-0.438419773,-0.158681076,4.336400261,24.49033159,4.81E-06,0.000292345, unknown protein; LOCATED IN: chloroplast; EXPRESSED IN: 22 plant structures; EXPRESSED DURING: 13 growth stages; BEST Arabidopsis thaliana protein match is: unknown protein (TAIR:AT1G54680.3); Has 30201 Blast hits to 17322 proteins in 780 species: Archae - 12; Bacteria - 1396; Metazoa - 17338; Fungi - 3422; Plants - 5037; Viruses - 0; Other Eukaryotes - 2996 (source: NCBI BLink). ,NA
286,AT1G06002,-0.728920998,0.191149471,4.418413492,24.40481461,5.02E-06,0.000304049," Potential natural antisense gene, locus overlaps with AT1G06000 ",NA
287,AT2G42170,-1.13321325,0.69193365,3.326500008,24.37848723,5.08E-06,0.000307005, Actin family protein ,NA
288,AT2G32540,1.227564846,-0.749758213,2.321166229,24.29549685,5.30E-06,0.000318292, cellulose synthase-like B4 ,ATCSLB04;ATCSLB4;CSLB04
289,AT3G14570,0.965536343,-0.431522261,3.006528189,24.28699939,5.32E-06,0.000318292, glucan synthase-like 4 ,ATGSL04;atgsl4;gsl04;GSL04;GSL4
290,AT1G76080,-0.257735672,-0.100857519,7.341524161,24.28547784,5.33E-06,0.000318292, chloroplastic drought-induced stress protein of 32 kD ,ATCDSP32;CDSP32
291,AT1G47580,-0.611009274,-0.01492045,3.781089637,24.23422249,5.47E-06,0.000325432, Pentatricopeptide repeat (PPR) superfamily protein ,DYW1
292,AT3G04140,0.726633767,-0.409957552,3.412359088,24.20926434,5.53E-06,0.000328391, Ankyrin repeat family protein ,NA
293,AT2G46450,0.519493022,-0.236845516,5.447009957,24.16888733,5.65E-06,0.000333944, cyclic nucleotide-gated channel 12 ,ATCNGC12;CNGC12
294,AT5G35490,-1.510528136,-0.106213496,2.221318417,24.09978708,5.85E-06,0.000344508, mto 1 responding up 1 ,ATMRU1;MRU1
295,AT1G68050,-0.87584716,-0.089196104,4.532193992,24.08382301,5.89E-06,0.000346091," flavin-binding, kelch repeat, f box 1 ",ADO3;FKF1
296,AT5G60100,-0.564461217,0.005108077,4.485957926,23.88687218,6.50E-06,0.000380617, pseudo-response regulator 3 ,APRR3;PRR3
297,AT2G17033,-0.385472953,0.115117722,5.362718394,23.85630513,6.60E-06,0.000385178, pentatricopeptide (PPR) repeat-containing protein ,NA
298,AT2G16890,0.581207457,0.454172476,3.485914292,23.84754011,6.63E-06,0.000385571, UDP-Glycosyltransferase superfamily protein ,NA
299,AT3G44450,-0.406215261,-0.22040892,4.609733943,23.76974018,6.89E-06,0.000399525, unknown protein; BEST Arabidopsis thaliana protein match is: unknown protein (TAIR:AT3G52740.1); Has 63 Blast hits to 63 proteins in 12 species: Archae - 0; Bacteria - 0; Metazoa - 0; Fungi - 0; Plants - 63; Viruses - 0; Other Eukaryotes - 0 (source: NCBI BLink). ,BIC2
300,AT4G21670,-0.538988308,0.023988249,4.167172317,23.73530743,7.01E-06,0.000404747, C-terminal domain phosphatase-like 1 ,ATCPL1;CPL1;FRY2;RCF2;SHI4
301,AT2G40100,-1.417153217,0.849568509,2.590999474,23.73043554,7.03E-06,0.000404747, light harvesting complex photosystem II ,LHCB4.3
302,AT1G10640,0.51673522,0.060799253,4.34674907,23.70641783,7.12E-06,0.000406448, Pectin lyase-like superfamily protein ,NA
303,AT5G07180,0.00497862,0.600305412,4.304190843,23.70061712,7.14E-06,0.000406448, ERECTA-like 2 ,ERL2
304,AT2G17280,1.448798244,-0.120841786,0.8391689,23.69692123,7.15E-06,0.000406448, Phosphoglycerate mutase family protein ,NA
305,AT4G38850,-2.175567912,0.229591546,0.906764564,23.69564346,7.15E-06,0.000406448, SAUR-like auxin-responsive protein family  ,ATSAUR15;SAUR-AC1;SAUR15;SAUR_AC1
306,AT4G33810,-0.901886293,0.102032979,2.576539733,23.67685705,7.22E-06,0.000408315, Glycosyl hydrolase superfamily protein ,NA
307,AT5G54190,-1.366311424,0.346245994,3.109392588,23.67340772,7.23E-06,0.000408315, protochlorophyllide oxidoreductase A ,PORA
308,AT1G32460,-0.847625315,-0.282641141,1.966811505,23.63325735,7.38E-06,0.000415242, unknown protein; Has 19 Blast hits to 19 proteins in 8 species: Archae - 0; Bacteria - 0; Metazoa - 0; Fungi - 0; Plants - 19; Viruses - 0; Other Eukaryotes - 0 (source: NCBI BLink). ,NA
309,AT4G14330,0.234408881,0.116481809,6.670320478,23.61584876,7.45E-06,0.000417516, P-loop containing nucleoside triphosphate hydrolases superfamily protein ,NA
310,AT4G02660,0.309136673,0.521219869,3.066879103,23.25468686,8.92E-06,0.000498535," Beige/BEACH domain ;WD domain, G-beta repeat protein ",BCHA2
311,AT4G33467,-2.477402092,0.147491153,0.644359715,23.12297449,9.53E-06,0.00053076, unknown protein; Has 25 Blast hits to 25 proteins in 9 species: Archae - 0; Bacteria - 0; Metazoa - 0; Fungi - 0; Plants - 25; Viruses - 0; Other Eukaryotes - 0 (source: NCBI BLink). ,NA
312,AT3G25760,-2.028477115,-1.063667603,0.587211492,23.103417,9.62E-06,0.000534257, allene oxide cyclase 1 ,AOC1;ERD12
313,AT2G14560,3.48547702,-2.058110673,1.504347827,23.04098801,9.92E-06,0.000549436, Protein of unknown function (DUF567) ,LURP1
314,AT2G03980,-0.666981084,-0.415241479,2.464481515,22.98302789,1.02E-05,0.00056379, GDSL-like Lipase/Acylhydrolase superfamily protein ,NA
315,AT5G46830,-1.009493446,-0.95077159,1.408959113,22.75744868,1.14E-05,0.000629101, NACL-inducible gene 1 ,ATNIG1;bhlh28;MYC5;NIG1
316,AT4G24350,-0.459857582,-0.290716556,4.578885426,22.71737958,1.17E-05,0.000639801, Phosphorylase superfamily protein ,NA
317,AT5G14910,-0.265210629,-0.083463306,6.751446526,22.63117718,1.22E-05,0.00066414, Heavy metal transport/detoxification superfamily protein  ,NA
318,AT4G27860,-1.21526581,-0.166971359,1.810269733,22.63009153,1.22E-05,0.00066414, vacuolar iron transporter (VIT) family protein ,MEB1
319,AT4G27370,0.498042771,-0.052176931,3.767142315,22.5669617,1.26E-05,0.000681931, P-loop containing nucleoside triphosphate hydrolases superfamily protein ,ATVIIIB;VIIIB
320,AT5G44530,-0.502295614,-0.041821729,4.139426803,22.56468124,1.26E-05,0.000681931, Subtilase family protein ,NA
321,AT1G80180,-0.414611106,-0.260453073,4.893920994,22.51018163,1.29E-05,0.000698586, unknown protein; FUNCTIONS IN: molecular_function unknown; INVOLVED IN: biological_process unknown; LOCATED IN: plasma membrane; EXPRESSED IN: 21 plant structures; EXPRESSED DURING: 10 growth stages; BEST Arabidopsis thaliana protein match is: unknown protein (TAIR:AT1G15400.3); Has 30201 Blast hits to 17322 proteins in 780 species: Archae - 12; Bacteria - 1396; Metazoa - 17338; Fungi - 3422; Plants - 5037; Viruses - 0; Other Eukaryotes - 2996 (source: NCBI BLink). ,NA
322,AT1G70420,-0.836315599,0.34624479,4.481946281,22.48541533,1.31E-05,0.000705093, Protein of unknown function (DUF1645) ,NA
323,AT1G70700,-1.400530485,0.035527997,3.771081213,22.42377676,1.35E-05,0.000724222, TIFY domain/Divergent CCT motif family protein ,JAZ9;TIFY7
324,AT1G14345,-0.412837762,-0.053021924,7.712268005,22.41949596,1.35E-05,0.000724222, NAD(P)-linked oxidoreductase superfamily protein ,NA
325,AT1G03220,-0.484118032,-0.175289483,5.37804948,22.40299058,1.37E-05,0.000726305, Eukaryotic aspartyl protease family protein ,NA
326,AT1G12240,-0.356526935,-0.089122045,5.903648731,22.40144544,1.37E-05,0.000726305, Glycosyl hydrolases family 32 protein ,ATBETAFRUCT4;AtFRUCT4;AtVI2;FRUCT4;VAC-INV;VI2
327,AT5G62350,-0.452400504,0.046931983,7.664095087,22.38457046,1.38E-05,0.000730219, Plant invertase/pectin methylesterase inhibitor superfamily protein ,NA
328,AT2G16380,-0.416938375,-0.662484412,2.549767617,22.28422752,1.45E-05,0.000765449, Sec14p-like phosphatidylinositol transfer family protein ,NA
329,AT5G50260,1.19182384,0.681535846,1.213039529,22.25329217,1.47E-05,0.000775018, Cysteine proteinases superfamily protein ,CEP1
330,AT4G30470,0.573725397,-0.148806463,4.355171135,22.23424474,1.49E-05,0.000780063, NAD(P)-binding Rossmann-fold superfamily protein ,NA
331,AT1G77000,-0.862795872,0.188020921,2.712921836,22.17995273,1.53E-05,0.000799107, RNI-like superfamily protein ,ATSKP2;2;SKP2B
332,AT1G51460,0.674156749,-0.162008922,3.209119093,22.16344751,1.54E-05,0.000803302, ABC-2 type transporter family protein ,ABCG13;FOP2
333,AT3G21240,0.822869504,-0.15829466,2.426069977,22.04074954,1.64E-05,0.000851562, 4-coumarate:CoA ligase 2 ,4CL2;AT4CL2
334,AT2G46330,-0.36198389,-0.161396155,6.15736851,22.03211027,1.64E-05,0.000852688, arabinogalactan protein 16 ,AGP16;ATAGP16
335,AT5G18670,0.543247986,0.020149705,3.873928883,21.90975597,1.75E-05,0.000901766, beta-amylase 3 ,BAM9;BMY3
336,AT4G33150,0.766106447,-0.326631016,3.495525861,21.90824616,1.75E-05,0.000901766, lysine-ketoglutarate reductase/saccharopine dehydrogenase bifunctional enzyme ,LKR;LKR/SDH;SDH
337,AT3G44160,-0.395620947,-0.130487703,3.938228846,21.89145069,1.76E-05,0.000906672, Outer membrane OMP85 family protein ,P39
338,AT1G23390,-0.397705579,-0.040554509,7.002071624,21.86833304,1.78E-05,0.0009145, Kelch repeat-containing F-box family protein ,KFB
339,AT4G25260,-0.346368602,-0.221894788,4.236681446,21.83906657,1.81E-05,0.000925243, Plant invertase/pectin methylesterase inhibitor superfamily protein ,PMEI7
340,AT1G01060,1.169282995,-0.181573766,2.478192118,21.69211349,1.95E-05,0.000992858, Homeodomain-like superfamily protein ,LHY;LHY1
341,AT1G76820,0.688631833,0.007683689,3.817745521,21.65257858,1.99E-05,0.001009709, eukaryotic translation initiation factor 2 (eIF-2) family protein ,NA
342,AT5G52570,0.799320971,-0.127593299,3.0554134,21.64456069,2.00E-05,0.001010801, beta-carotene hydroxylase 2 ,B2;BCH2;BETA-OHASE 2;CHY2
343,AT5G42280,1.04870999,0.128678394,1.963305904,21.58054608,2.06E-05,0.001037716, Cysteine/Histidine-rich C1 domain family protein ,NA
344,AT5G53580,-0.324713881,-0.1239179,4.934404304,21.58034139,2.06E-05,0.001037716, NAD(P)-linked oxidoreductase superfamily protein ,AtPLR1;PLR1
345,AT1G03870,-0.46919781,-0.059848956,5.614088151,21.56199255,2.08E-05,0.001044244, FASCICLIN-like arabinoogalactan 9 ,FLA9
346,AT3G08820,-0.550945648,-0.282130114,3.016645092,21.52003334,2.12E-05,0.001063302, Pentatricopeptide repeat (PPR) superfamily protein ,NA
347,AT5G43700,-0.16857348,-0.290975412,5.77174801,21.49472638,2.15E-05,0.001073738, AUX/IAA transcriptional regulator family protein ,ATAUX2-11;IAA4
348,AT1G61180,0.47342439,-0.08833,4.816317636,21.36369435,2.30E-05,0.001142014, LRR and NB-ARC domains-containing disease resistance protein ,UNI
349,AT1G21460,-0.240692788,-0.509405852,3.722152665,21.35993844,2.30E-05,0.001142014, Nodulin MtN3 family protein ,AtSWEET1;SWEET1
350,AT4G15210,-1.206283704,-1.838910732,2.124505428,21.32475027,2.34E-05,0.001158963, beta-amylase 5 ,AT-BETA-AMY;ATBETA-AMY;BAM5;BMY1;RAM1
351,AT2G01140,0.337397556,-0.100902071,5.898875172,21.30183665,2.37E-05,0.001168978, Aldolase superfamily protein ,AtFBA3;FBA3;PDE345
352,AT3G23030,-0.334967475,-0.400187592,4.662864982,21.27407497,2.40E-05,0.00118195, indole-3-acetic acid inducible 2 ,IAA2
353,AT5G15240,1.060255749,0.034784565,1.361753808,21.2448262,2.44E-05,0.001195965, Transmembrane amino acid transporter family protein ,NA
354,AT5G47720,0.704576483,-0.217863915,4.051096598,21.23717913,2.45E-05,0.001197155, Thiolase family protein ,AACT1
355,AT1G75100,0.426882415,-0.053100345,5.105285301,21.22197704,2.46E-05,0.001202891, J-domain protein required for chloroplast accumulation response 1 ,AUXILIN-LIKE6;JAC1
356,AT5G50950,-0.25940488,-0.52447441,6.384200063,21.18411719,2.51E-05,0.001222435, FUMARASE 2 ,FUM2
357,AT1G21670,-0.620287274,0.233506065,3.824588623,21.10933412,2.61E-05,0.001265455," LOCATED IN: cell wall, plant-type cell wall; EXPRESSED IN: 23 plant structures; EXPRESSED DURING: 14 growth stages; CONTAINS InterPro DOMAIN/s: WD40-like Beta Propeller (InterPro:IPR011659), Six-bladed beta-propeller, TolB-like (InterPro:IPR011042); BEST Arabidopsis thaliana protein match is: DPP6 N-terminal domain-like protein (TAIR:AT1G21680.1); Has 8461 Blast hits to 5060 proteins in 1257 species: Archae - 79; Bacteria - 5567; Metazoa - 37; Fungi - 70; Plants - 117; Viruses - 0; Other Eukaryotes - 2591 (source: NCBI BLink). ",NA
358,AT2G05160,-0.764783104,-0.003625811,3.349951014,21.08675839,2.64E-05,0.001276245, CCCH-type zinc fingerfamily protein with RNA-binding domain ,NA
359,AT1G07280,-0.604310996,0.083525171,4.665095723,20.98521775,2.77E-05,0.001338973, Tetratricopeptide repeat (TPR)-like superfamily protein ,NA
360,AT5G59130,-0.283030179,-0.529809857,3.706124452,20.96625459,2.80E-05,0.00134531, Subtilase family protein ,NA
361,AT2G28900,-0.400258808,-0.166832009,6.941271249,20.96466309,2.80E-05,0.00134531, outer plastid envelope protein 16-1 ,ATOEP16-1;ATOEP16-L;OEP16;OEP16-1
362,AT3G12145,-0.762090791,0.066007045,6.136198989,20.94003357,2.84E-05,0.001358218, Leucine-rich repeat (LRR) family protein ,FLR1;FTM4
363,AT2G40020,-0.571336275,0.127592891,5.264031535,20.83055412,3.00E-05,0.001430686, Nucleolar histone methyltransferase-related protein ,NA
364,AT5G27280,-0.34166938,-0.479799147,4.010830047,20.77706828,3.08E-05,0.001465426, Zim17-type zinc finger protein ,NA
365,AT5G59570,-0.870904533,0.348731333,2.672393606,20.60592617,3.35E-05,0.001591972, Homeodomain-like superfamily protein ,BOA
366,AT1G25220,-0.216817499,-0.46224441,4.659634037,20.57726131,3.40E-05,0.001610541, anthranilate synthase beta subunit 1 ,ASB1;TRP4;WEI7
367,AT3G11170,-0.263390545,-0.126972131,7.435579479,20.5100649,3.52E-05,0.001657556, fatty acid desaturase 7 ,AtFAD7;FAD7;FADD
368,AT1G31230,-0.384718023,-0.068035347,6.079830262,20.50881386,3.52E-05,0.001657556, aspartate kinase-homoserine dehydrogenase i ,AK-HSDH;AK-HSDH I
369,AT5G20250,-0.475961361,-0.399183935,5.378836774,20.48861963,3.56E-05,0.00166984, Raffinose synthase family protein ,DIN10;RS6
370,AT3G16660,-0.418841734,-0.27646368,4.931653736,20.46334071,3.60E-05,0.001686509, Pollen Ole e 1 allergen and extensin family protein ,NA
371,AT1G07180,0.473888964,-0.103206323,5.637362553,20.44973172,3.63E-05,0.001693447, alternative  NAD(P)H dehydrogenase 1 ,ATNDI1;NDA1
372,AT5G19260,-0.699848522,0.274009214,3.726933474,20.40591597,3.71E-05,0.001725845, Protein of unknown function (DUF3049) ,FAF3
373,AT3G52040,-0.344948922,-0.207004046,5.533116345,20.40107788,3.72E-05,0.001725845, unknown protein; Has 37 Blast hits to 37 proteins in 15 species: Archae - 0; Bacteria - 0; Metazoa - 0; Fungi - 0; Plants - 37; Viruses - 0; Other Eukaryotes - 0 (source: NCBI BLink). ,NA
374,AT4G35090,0.536014935,-0.276500362,8.251129119,20.34558206,3.82E-05,0.001769553, catalase 2 ,CAT2
375,AT2G45180,-0.308910922,-0.225391145,8.525411796,20.3403621,3.83E-05,0.001769553, Bifunctional inhibitor/lipid-transfer protein/seed storage 2S albumin superfamily protein ,NA
376,AT5G14580,-0.571426849,0.017939246,4.736731382,20.32405862,3.86E-05,0.001779292," polyribonucleotide nucleotidyltransferase, putative ",NA
377,AT1G74810,-0.798159527,-0.044680629,2.384460827,20.29743487,3.91E-05,0.001794694, HCO3- transporter family ,BOR5
378,AT2G04790,-1.518601626,0.283483281,1.356714999,20.29621066,3.92E-05,0.001794694, unknown protein; Has 35333 Blast hits to 34131 proteins in 2444 species: Archae - 798; Bacteria - 22429; Metazoa - 974; Fungi - 991; Plants - 531; Viruses - 0; Other Eukaryotes - 9610 (source: NCBI BLink). ,NA
379,AT1G53870,-1.198639323,-0.202698416,2.264988521,20.24684613,4.01E-05,0.001834689, Protein of unknown function (DUF567) ,NA
380,AT1G77620,0.279467435,0.330188497,3.539148871,20.21432177,4.08E-05,0.001859862, P-loop containing nucleoside triphosphate hydrolases superfamily protein ,NA
381,AT5G65080,3.398495585,-1.157999344,1.68271681,20.2032528,4.10E-05,0.001865275, K-box region and MADS-box transcription factor family protein  ,AGL68;MAF5
382,AT4G26660,0.407712662,-0.096324234,6.077629857,20.1191104,4.28E-05,0.00193908, INVOLVED IN: biological_process unknown; LOCATED IN: chloroplast; EXPRESSED IN: 13 plant structures; EXPRESSED DURING: 7 growth stages; CONTAINS InterPro DOMAIN/s: Kinesin-related protein (InterPro:IPR010544); BEST Arabidopsis thaliana protein match is: unknown protein (TAIR:AT5G55520.2); Has 1807 Blast hits to 1807 proteins in 277 species: Archae - 0; Bacteria - 0; Metazoa - 736; Fungi - 347; Plants - 385; Viruses - 0; Other Eukaryotes - 339 (source: NCBI BLink). ,NA
383,AT3G07320,0.213697832,0.17079438,6.785041611,20.11517101,4.29E-05,0.00193908, O-Glycosyl hydrolases family 17 protein ,NA
384,AT5G63810,-0.48015059,0.304346975,6.776766785,20.07565148,4.37E-05,0.001972627, beta-galactosidase 10 ,AtBGAL10;BGAL10
385,AT5G02760,0.192543903,-0.914032692,4.054715357,20.05354992,4.42E-05,0.001989366, Protein phosphatase 2C family protein ,APD7;SSPP
386,AT3G02790,-0.508515488,-0.119468542,4.700475536,19.98779921,4.57E-05,0.002050528, zinc finger (C2H2 type) family protein ,MBS1
387,AT5G24810,0.476840003,-0.108915104,4.760025926,19.89490523,4.78E-05,0.002142465, ABC1 family protein ,NA
388,AT5G54160,-0.016099679,-0.449075287,5.606496712,19.88878183,4.80E-05,0.002143496, O-methyltransferase 1 ,AtCOMT;ATOMT1;COMT1;OMT1;OMT3
389,AT1G30260,-0.741535543,-1.022716996,0.988598447,19.85227538,4.89E-05,0.002177369, BEST Arabidopsis thaliana protein match is: Galactosyltransferase family protein (TAIR:AT4G21060.1); Has 30 Blast hits to 30 proteins in 8 species: Archae - 0; Bacteria - 0; Metazoa - 0; Fungi - 0; Plants - 30; Viruses - 0; Other Eukaryotes - 0 (source: NCBI BLink). ,NA
390,AT2G01870,-0.416298992,-0.321402812,4.135244964,19.84304856,4.91E-05,0.002181828," unknown protein; FUNCTIONS IN: molecular_function unknown; INVOLVED IN: biological_process unknown; LOCATED IN: chloroplast thylakoid membrane, chloroplast; EXPRESSED IN: 22 plant structures; EXPRESSED DURING: 13 growth stages; Has 11 Blast hits to 11 proteins in 5 species: Archae - 0; Bacteria - 0; Metazoa - 0; Fungi - 0; Plants - 11; Viruses - 0; Other Eukaryotes - 0 (source: NCBI BLink). ",NA
391,AT2G15020,0.781787241,-0.102948354,4.290479735,19.79245172,5.04E-05,0.002232006, unknown protein; BEST Arabidopsis thaliana protein match is: unknown protein (TAIR:AT5G64190.1); Has 72 Blast hits to 72 proteins in 10 species: Archae - 0; Bacteria - 0; Metazoa - 0; Fungi - 0; Plants - 72; Viruses - 0; Other Eukaryotes - 0 (source: NCBI BLink). ,NA
392,AT3G50270,-0.518008131,0.070812403,4.443043788,19.77919915,5.07E-05,0.002241113, HXXXD-type acyl-transferase family protein ,NA
393,AT4G19120,-0.354590776,-0.00927858,5.939411836,19.7336622,5.19E-05,0.002281629, S-adenosyl-L-methionine-dependent methyltransferases superfamily protein ,ERD3
394,AT4G14540,-0.419402021,0.105065205,6.310944544,19.73318771,5.19E-05,0.002281629," nuclear factor Y, subunit B3 ",NF-YB3
395,AT3G52380,-0.28284984,0.072948409,8.415478739,19.72020223,5.22E-05,0.002290677, chloroplast RNA-binding protein 33 ,CP33;PDE322
396,AT3G44670,0.190232814,0.146885648,5.514013402,19.56952065,5.63E-05,0.002463689, Disease resistance protein (TIR-NBS-LRR class) family ,DM2h
397,AT2G04400,-0.19381786,-0.371267336,4.880487053,19.48156033,5.88E-05,0.002567975, Aldolase-type TIM barrel family protein ,IGPS
398,AT1G51400,-0.23819028,-0.281448292,7.927918252,19.36667687,6.23E-05,0.00271297, Photosystem II 5 kD protein ,NA
399,AT1G25275,-0.483949671,-0.244079365,3.644530713,19.21952394,6.71E-05,0.002912788, unknown protein; FUNCTIONS IN: molecular_function unknown; INVOLVED IN: response to karrikin; LOCATED IN: endomembrane system; EXPRESSED IN: 23 plant structures; EXPRESSED DURING: 13 growth stages; Has 35333 Blast hits to 34131 proteins in 2444 species: Archae - 798; Bacteria - 22429; Metazoa - 974; Fungi - 991; Plants - 531; Viruses - 0; Other Eukaryotes - 9610 (source: NCBI BLink). ,NA
400,AT5G24060,-0.336058006,0.123100793,6.190209994,19.2060033,6.75E-05,0.002925215, Pentatricopeptide repeat (PPR) superfamily protein ,NA
401,AT5G24570,-0.500849427,-0.65482758,2.70598327,19.19082327,6.80E-05,0.002940152, unknown protein; Has 30201 Blast hits to 17322 proteins in 780 species: Archae - 12; Bacteria - 1396; Metazoa - 17338; Fungi - 3422; Plants - 5037; Viruses - 0; Other Eukaryotes - 2996 (source: NCBI BLink). ,NA
402,AT1G52770,-0.504965715,-0.18286767,3.586958441,19.17490659,6.86E-05,0.002956272, Phototropic-responsive NPH3 family protein ,NA
403,AT3G11402,0.913103478,0.708174974,1.435082619,19.16984917,6.88E-05,0.002956402, Cysteine/Histidine-rich C1 domain family protein ,NA
404,AT1G79440,-0.500458291,0.143613512,5.348208832,19.16151082,6.90E-05,0.002961405, aldehyde dehydrogenase 5F1 ,ALDH5F1;ENF1;SSADH;SSADH1
405,AT5G15580,0.116870693,0.330614404,5.058481327,19.05973488,7.26E-05,0.003108312, longifolia1 ,LNG1;TRM2
406,AT2G44080,-1.05256391,-0.81904588,0.476343842,19.0456272,7.32E-05,0.003122605, ARGOS-like ,ARL
407,AT5G02490,0.304745384,0.248713756,5.02789876,19.03310092,7.36E-05,0.003134503, Heat shock protein 70 (Hsp 70) family protein ,AtHsp70-2;Hsp70-2
408,AT5G07000,0.122482172,-1.47684341,1.942225871,19.01549201,7.43E-05,0.003154472, sulfotransferase 2B ,ATST2B;ST2B
409,AT1G31173,-0.575179429,-0.772481968,3.034086761,18.97936045,7.56E-05,0.003204124, MIR167D; miRNA ,MIR167D
410,AT1G70760,-0.354496487,-0.098150973,5.994638191,18.96340045,7.62E-05,0.003221918, inorganic carbon transport protein-related ,CRR23;NdhL
411,AT5G15020,0.210627098,0.104636142,6.116916516,18.90900338,7.83E-05,0.003302697, SIN3-like 2 ,SNL2
412,AT4G02990,-0.152027957,-0.201927951,6.367637218,18.79573357,8.29E-05,0.003486659, Mitochondrial transcription termination factor family protein ,BSM;RUG2
413,AT4G00870,2.229582258,-0.225705399,0.495974348,18.78681704,8.33E-05,0.003493759, basic helix-loop-helix (bHLH) DNA-binding superfamily protein ,bHLH014;bHLH14
414,AT3G47070,-0.231065091,-0.261975272,6.910367162,18.77287041,8.39E-05,0.003509709," LOCATED IN: thylakoid, chloroplast thylakoid membrane, chloroplast, chloroplast envelope; EXPRESSED IN: 22 plant structures; EXPRESSED DURING: 13 growth stages; CONTAINS InterPro DOMAIN/s: Thylakoid soluble phosphoprotein TSP9 (InterPro:IPR021584); Has 37 Blast hits to 37 proteins in 10 species: Archae - 0; Bacteria - 0; Metazoa - 0; Fungi - 0; Plants - 37; Viruses - 0; Other Eukaryotes - 0 (source: NCBI BLink). ",NA
415,AT3G23780,0.363535706,0.059391636,4.612741919,18.75527088,8.46E-05,0.003532198, nuclear RNA polymerase D2A ,DMS2;DRD2;NRPD2;NRPD2A;NRPE2;OCP1
416,AT1G17380,-2.585349284,-0.354153232,1.387805522,18.74843644,8.49E-05,0.003535769, jasmonate-zim-domain protein 5 ,JAZ5;TIFY11A
417,AT4G04410,-1.027343858,-0.080126649,1.960595759,18.73413067,8.55E-05,0.003552611, transposable element gene ,NA
418,AT4G00165,-0.438646674,-0.083262763,4.750528081,18.71176559,8.65E-05,0.003583966, Bifunctional inhibitor/lipid-transfer protein/seed storage 2S albumin superfamily protein ,NA
419,AT4G25290,0.264513485,0.112494876,5.532026438,18.69673879,8.71E-05,0.003602377, DNA photolyases;DNA photolyases ,NA
420,AT1G22590,-0.768583275,0.252782526,3.482191765,18.67814814,8.79E-05,0.003627361, AGAMOUS-like 87 ,AGL87
421,AT2G14900,-0.573291448,-0.173800116,4.523400971,18.62821192,9.01E-05,0.003710236, Gibberellin-regulated family protein ,NA
422,AT5G33320,-0.166758776,-0.253042877,6.537176094,18.61930783,9.05E-05,0.00371796, Glucose-6-phosphate/phosphate translocator-related ,ARAPPT;CUE1;NOX1;PPT
423,AT2G01420,-0.226875556,-0.107422799,6.75455713,18.5728626,9.27E-05,0.003796315, Auxin efflux carrier family protein ,ATPIN4;PIN4
424,AT2G47440,0.268278708,0.216809416,5.351730131,18.46621025,9.77E-05,0.003994809, Tetratricopeptide repeat (TPR)-like superfamily protein ,NA
425,AT5G65630,0.256391482,0.176128808,7.05840152,18.39134759,0.000101477,0.004137415, global transcription factor group E7 ,GTE7
426,AT4G02710,0.384657401,0.036318926,4.511842498,18.31834045,0.00010525,0.004281163, Kinase interacting (KIP1-like) family protein ,NET1C
427,AT4G02530,-0.11109087,-0.246713071,7.829709007,18.2845926,0.000107041,0.004343819, chloroplast thylakoid lumen protein ,MPH2
428,AT1G21650,-0.262161966,-0.224781752,4.759556599,18.26363327,0.000108169,0.004379324, Preprotein translocase SecA family protein ,SECA2
429,AT1G66820,-1.057921809,0.556430028,2.62528383,18.20435307,0.000111423,0.004500555, glycine-rich protein ,NA
430,AT4G31985,-0.353624752,-0.035349405,7.129442026,18.12832287,0.00011574,0.004664066, Ribosomal protein L39 family protein ,NA
431,AT5G38430,-0.42510385,-0.010256253,9.460494405,18.08771672,0.000118114,0.004748566, Ribulose bisphosphate carboxylase (small chain) family protein ,RBCS1B
432,AT4G25450,-0.411113462,0.127132589,5.091849305,18.08313197,0.000118385,0.004748566, non-intrinsic ABC protein 8 ,ABCB28;ATNAP8;NAP8
433,AT3G59320,0.379845958,0.345903532,2.972256881,18.0728755,0.000118994,0.004761957, Eukaryotic protein of unknown function (DUF914) ,NA
434,AT1G78970,1.027409592,-0.46596378,2.105360089,18.05481887,0.000120073,0.004793823, lupeol synthase 1 ,ATLUP1;LUP1
435,AT4G10910,-0.923650629,-0.038288411,1.990214262,18.0503201,0.000120344,0.004793823, unknown protein; Has 30201 Blast hits to 17322 proteins in 780 species: Archae - 12; Bacteria - 1396; Metazoa - 17338; Fungi - 3422; Plants - 5037; Viruses - 0; Other Eukaryotes - 2996 (source: NCBI BLink). ,NA
436,AT3G04910,-0.227177279,-0.200292973,6.368551795,18.03381946,0.000121341,0.004822451, with no lysine (K) kinase 1 ,ATWNK1;WNK1;ZIK4
437,AT1G78820,-0.305262622,-0.169784113,4.893560314,18.01983122,0.000122192,0.004845185, D-mannose binding lectin protein with Apple-like carbohydrate-binding domain ,NA
438,AT1G03760,-0.623030303,0.474687191,3.887309576,18.00462,0.000123125,0.00487103, Prefoldin chaperone subunit family protein ,NA
439,AT3G51075,0.55404662,0.043654696,3.456403425,17.99236534,0.000123882,0.004889804, other RNA ,NA
440,AT2G43535,-0.303873307,-1.062320798,2.161823761,17.97434538,0.000125003,0.004922846, Scorpion toxin-like knottin superfamily protein ,NA
441,AT3G27160,-0.243285811,-0.050391144,10.0890589,17.94600362,0.000126787,0.004981782, Ribosomal protein S21 family protein ,GHS1
442,AT4G10430,0.355925447,-0.133100151,5.55965875,17.91052791,0.000129056,0.005059463, TMPIT-like protein ,NA
443,AT3G10520,-0.352078453,0.043561804,5.923575898,17.90230594,0.000129588,0.005068838, haemoglobin 2 ,AHB2;ARATH GLB2;ATGLB2;GLB2;HB2;NSHB2;PGB2
444,AT2G42270,0.251633612,0.061903492,5.915467239,17.87752991,0.000131203,0.005120462, U5 small nuclear ribonucleoprotein helicase ,BRR2b
445,AT3G23640,0.341597133,-0.070795375,5.198142929,17.85992516,0.000132363,0.005144838, heteroglycan glucosidase 1 ,HGL1
446,AT5G41740,1.314433533,-0.683844542,1.90892435,17.85904278,0.000132421,0.005144838, Disease resistance protein (TIR-NBS-LRR class) family ,NA
447,AT4G02290,0.488128194,0.010467249,4.633449399,17.82209072,0.000134891,0.005229054, glycosyl hydrolase 9B13 ,AtGH9B13;GH9B13
448,AT5G40760,0.320476363,0.000507223,4.781383123,17.75245502,0.00013967,0.005402239, glucose-6-phosphate dehydrogenase 6 ,G6PD6
449,AT1G52400,-0.535383815,-0.245999023,7.251025382,17.72567574,0.000141553,0.005451121, beta glucosidase 18 ,ATBG1;BGL1;BGLU18
450,AT2G22540,-0.24225186,0.008768367,6.742430696,17.72553076,0.000141563,0.005451121, K-box region and MADS-box transcription factor family protein  ,AGL22;FAQ1;SVP
451,AT5G25350,-0.158675802,-0.431475324,4.692960319,17.70784784,0.00014282,0.005487337, EIN3-binding F box protein 2 ,EBF2
452,AT3G62930,-1.253064128,0.348556649,1.467800459,17.70326177,0.000143148,0.005487766, Thioredoxin superfamily protein ,GRXS6;ROXY17
453,AT3G05800,-1.340992836,0.434877528,2.187516582,17.64447107,0.000147418,0.005633433, AtBS1(activation-tagged BRI1 suppressor 1)-interacting factor 1 ,AIF1
454,AT5G19390,0.300181616,-0.065122371,5.859615964,17.636725,0.00014799,0.005633433, Rho GTPase activation protein (RhoGAP) with PH domain ,PHGAP2
455,AT1G56650,-0.7531034,-0.365069671,2.435634402,17.63108571,0.000148408,0.005633433, production of anthocyanin pigment 1 ,ATMYB75;AtPAP1;MYB75;PAP1;SIAA1
456,AT2G14660,-0.82645783,0.484479105,5.019329344,17.62777399,0.000148654,0.005633433, unknown protein; CONTAINS InterPro DOMAIN/s: Uncharacterised protein family UPF0310 (InterPro:IPR002740); Has 2761 Blast hits to 2761 proteins in 686 species: Archae - 5; Bacteria - 1143; Metazoa - 73; Fungi - 78; Plants - 42; Viruses - 0; Other Eukaryotes - 1420 (source: NCBI BLink). ,NA
457,AT1G16060,-0.690859327,-0.20647379,2.728649847,17.62599543,0.000148787,0.005633433, ARIA-interacting double AP2 domain protein ,ADAP;WRI3
458,AT5G13320,-1.253476437,-0.538992525,1.050185479,17.62449199,0.000148898,0.005633433, Auxin-responsive GH3 family protein ,AtGH3.12;GDG1;GH3.12;PBS3;WIN3
459,AT1G30270,0.473199963,-0.036678977,3.835220684,17.59330506,0.000151238,0.0057095, CBL-interacting protein kinase 23 ,ATCIPK23;CIPK23;LKS1;PKS17;SnRK3.23
460,AT5G59050,0.562807721,-0.155517721,3.80981844,17.57535884,0.000152602,0.005746997, unknown protein; BEST Arabidopsis thaliana protein match is: unknown protein (TAIR:AT3G54000.1); Has 35333 Blast hits to 34131 proteins in 2444 species: Archae - 798; Bacteria - 22429; Metazoa - 974; Fungi - 991; Plants - 531; Viruses - 0; Other Eukaryotes - 9610 (source: NCBI BLink). ,NA
461,AT3G53160,1.604039519,-0.610998875,1.49222429,17.57151755,0.000152895,0.005746997, UDP-glucosyl transferase 73C7 ,UGT73C7
462,AT4G15490,0.283386033,0.180894563,4.401183514,17.55741784,0.000153977,0.005775128, UDP-Glycosyltransferase superfamily protein ,UGT84A3
463,AT3G22231,3.095745639,-1.304208282,3.033946375,17.50013963,0.00015845,0.005921356, pathogen and circadian controlled 1 ,PCC1
464,AT2G33830,-1.73272359,-0.115241559,3.281276895,17.49727627,0.000158677,0.005921356, Dormancy/auxin associated family protein ,AtDRM2;DRM2
465,AT5G16190,-1.43416767,1.172598213,1.83875806,17.49446277,0.000158901,0.005921356, cellulose synthase like A11 ,ATCSLA11;CSLA11
466,AT5G41315,-1.387561869,0.294370898,1.321685923,17.47843416,0.000160179,0.005945439, basic helix-loop-helix (bHLH) DNA-binding superfamily protein ,GL3;MYC6.2
467,AT1G30420,0.582867435,0.207735889,2.655734867,17.47710647,0.000160286,0.005945439, multidrug resistance-associated protein 12 ,ABCC11;ATMRP12;MRP12
468,AT3G44890,-0.214694231,-0.028476582,8.140936229,17.4734833,0.000160576,0.005945439, ribosomal protein L9 ,RPL9
469,AT5G55510,-0.778427412,0.704088245,3.50873911,17.46136387,0.000161552,0.005968822, Mitochondrial import inner membrane translocase subunit Tim17/Tim22/Tim23 family protein ,HP22
470,AT1G64640,-0.250027271,-0.215273481,4.77969102,17.43130844,0.000163998,0.006046305, early nodulin-like protein 8 ,AtENODL8;ENODL8
471,AT4G39230,0.798583647,-0.148488209,2.527445559,17.42074893,0.000164867,0.006055579, NmrA-like negative transcriptional regulator family protein ,AtPCBER1;PCBER1
472,AT4G17470,-2.662606902,-0.041931044,1.82341303,17.41975065,0.000164949,0.006055579, alpha/beta-Hydrolases superfamily protein ,NA
473,AT1G10095,0.277383436,0.744548947,2.168778325,17.39365446,0.000167115,0.00612214, Protein prenylyltransferase superfamily protein ,NA
474,AT1G75460,-0.278353754,-0.195195486,7.168339843,17.38233787,0.000168063,0.006143889, ATP-dependent protease La (LON) domain protein ,NA
475,AT5G64770,-0.168078887,-0.465265347,5.591842425,17.37647727,0.000168557,0.006148947," Encodes a root meristem growth factor (RGF).  Belongs to a family of functionally redundant homologous peptides that are secreted, tyrosine-sulfated, and expressed mainly in the stem cell area and the innermost layer of central columella cells. RGFs are required for maintenance of the root stem cell niche and transit amplifying cell proliferation.  Members of this family include: At5g60810 (RGF1), At1g13620 (RGF2), At2g04025 (RGF3), At3g30350 (RGF4), At5g51451 (RGF5), At4g16515 (RGF6), At3g02240 (RGF7), At2g03830 (RGF8) and At5g64770 (RGF9). ",CLEL 9;GLV2;RGF9
476,AT4G16515,-0.44318842,-0.921207065,2.096556754,17.35924064,0.000170016,0.00618914," Encodes a root meristem growth factor (RGF).  Belongs to a family of functionally redundant homologous peptides that are secreted, tyrosine-sulfated, and expressed mainly in the stem cell area and the innermost layer of central columella cells. RGFs are required for maintenance of the root stem cell niche and transit amplifying cell proliferation.  Members of this family include: At5g60810 (RGF1), At1g13620 (RGF2), At2g04025 (RGF3), At3g30350 (RGF4), At5g51451 (RGF5), At4g16515 (RGF6), At3g02240 (RGF7), At2g03830 (RGF8) and At5g64770 (RGF9). ",CLEL 6;GLV1;RGF6
477,AT4G16750,-0.997218087,0.447303648,2.246562706,17.30425079,0.000174755,0.006348334, Integrase-type DNA-binding superfamily protein ,NA
478,AT5G07820,-0.933718832,0.483585713,2.904232075,17.24544524,0.00017997,0.006524086, Plant calmodulin-binding protein-related ,NA
479,AT2G26080,0.330877294,-0.152032359,7.421355984,17.20694318,0.000183468,0.006637013, glycine decarboxylase P-protein 2 ,AtGLDP2;GLDP2
480,AT5G04080,-0.691184131,-0.5779034,1.863998974,17.19286639,0.000184764,0.006668224, unknown protein; FUNCTIONS IN: molecular_function unknown; INVOLVED IN: biological_process unknown; LOCATED IN: plasma membrane; EXPRESSED IN: 16 plant structures; EXPRESSED DURING: 9 growth stages; Has 115 Blast hits to 115 proteins in 16 species: Archae - 0; Bacteria - 0; Metazoa - 0; Fungi - 5; Plants - 110; Viruses - 0; Other Eukaryotes - 0 (source: NCBI BLink). ,AthCYSTM12
481,AT3G05020,-0.351558802,-0.067124897,4.621327975,17.18922682,0.0001851,0.006668224, acyl carrier protein 1 ,ACP;ACP1;AtACP1
482,AT1G25290,0.751749645,-0.392047043,3.217406837,17.17256577,0.000186649,0.006694593, RHOMBOID-like protein 10 ,ATRBL10;ATRBL7;AtRBL8;RBL10;RBL8
483,AT5G67150,-0.461912848,-0.132537117,3.774968169,17.16969476,0.000186917,0.006694593, HXXXD-type acyl-transferase family protein ,NA
484,AT1G66100,-0.312297403,-0.824136723,4.77205304,17.16889834,0.000186991,0.006694593, Plant thionin ,NA
485,AT5G09650,-0.227195589,-0.066179515,7.868551325,17.14840566,0.000188917,0.006749595, pyrophosphorylase 6 ,AtPPa6;PPa6
486,AT2G32440,-0.537861291,0.278169373,4.7122227,17.14226647,0.000189498,0.006756415, ent-kaurenoic acid hydroxylase 2 ,ATKAO2;CYP88A4;KAO2
487,AT2G40520,-0.575892958,0.114878403,3.855868134,17.11384202,0.00019221,0.006839052, Nucleotidyltransferase family protein ,NA
488,AT4G35290,0.480842575,0.311774736,2.846771741,17.10921712,0.000192655,0.006840838, glutamate receptor 2 ,ATGLR3.2;ATGLUR2;GLR3.2;GLUR2
489,AT1G20010,-0.25058825,0.021117796,8.274644979,17.09012176,0.000194503,0.006892342, tubulin beta-5 chain ,TUB5
490,AT3G12520,-0.776228214,-0.283206624,2.080304289,17.08540966,0.000194962,0.0068945, sulfate transporter 4;2 ,SULTR4;2
491,AT4G18370,-0.256370775,-0.070699634,5.937523451,17.07749975,0.000195735,0.006907724, DEGP protease 5 ,DEG5;DEGP5;HHOA
492,AT5G02160,-0.419387773,-0.142509118,7.543077899,17.07275442,0.0001962,0.00691006, unknown protein; FUNCTIONS IN: molecular_function unknown; INVOLVED IN: biological_process unknown; LOCATED IN: chloroplast thylakoid membrane; EXPRESSED IN: 23 plant structures; EXPRESSED DURING: 13 growth stages; Has 121 Blast hits to 121 proteins in 17 species: Archae - 0; Bacteria - 0; Metazoa - 0; Fungi - 0; Plants - 121; Viruses - 0; Other Eukaryotes - 0 (source: NCBI BLink). ,FIP
493,AT1G06190,-0.325534634,0.211784043,7.855570617,17.06627761,0.000196836,0.006918412, Rho termination factor ,RHON1
494,AT1G22770,-0.280437099,-0.171783241,6.198837473,16.9932119,0.00020416,0.007154158, gigantea protein (GI) ,FB;GI
495,AT4G07960,-0.719158748,0.419921906,3.092966644,16.99116556,0.000204369,0.007154158, Cellulose-synthase-like C12 ,ATCSLC12;CSLC12
496,AT2G38180,0.616969091,0.125573332,3.257893778,16.97359793,0.000206172,0.007202724, SGNH hydrolase-type esterase superfamily protein ,NA
497,AT5G61380,-0.375985027,0.064443191,6.503849608,16.96074966,0.000207501,0.007234559, CCT motif -containing response regulator protein ,APRR1;AtTOC1;PRR1;TOC1
498,AT3G16670,-0.427394493,-0.1600985,5.063246312,16.94985052,0.000208635,0.007259485, Pollen Ole e 1 allergen and extensin family protein ,NA
499,AT5G10760,1.833414619,-0.44978524,1.445212391,16.93011406,0.000210704,0.007316786, Eukaryotic aspartyl protease family protein ,AED1
500,AT1G56220,-0.396520225,0.14972958,6.973567285,16.9091062,0.000212929,0.007379258, Dormancy/auxin associated family protein ,NA
501,AT1G44350,-0.715391842,-0.605350521,2.243423733,16.90174124,0.000213714,0.007391698, IAA-leucine resistant (ILR)-like gene 6 ,ILL6
502,AT1G08070,-0.998070903,0.625959051,2.274951576,16.88708882,0.000215286,0.007431218, Tetratricopeptide repeat (TPR)-like superfamily protein ,EMB3102;OTP82
503,AT3G19050,0.391993158,-0.10740104,6.159080823,16.83150874,0.000221352,0.007625438, phragmoplast orienting kinesin 2 ,POK2
504,AT3G28956,1.916532254,-0.686123992,0.848649076,16.81820921,0.000222829,0.00766092," RNA polymerase II, Rpb4, core protein ",NA
505,AT3G58850,-0.640119419,0.099543241,3.441208207,16.8142874,0.000223267,0.00766092, phy rapidly regulated 2 ,HLH2;PAR2
506,AT5G60910,1.106319563,-0.19708239,2.089234225,16.80572179,0.000224225,0.007678596, AGAMOUS-like 8 ,AGL8;FUL
507,AT3G49300,-2.755859198,0.676711425,0.426921441,16.78435814,0.000226633,0.007745749, proline-rich family protein ,NA
508,AT4G33580,-0.192460565,-0.157548663,5.838823153,16.75426056,0.000230069,0.007847716, beta carbonic anhydrase 5 ,ATBCA5;BCA5
509,AT3G54640,-0.49729677,0.090557246,4.701859526,16.74957321,0.000230609,0.007850676, tryptophan synthase alpha chain ,TRP3;TSA1
510,AT2G47420,-0.452822229,0.237599273,5.43789962,16.7240872,0.000233567,0.007935766, Ribosomal RNA adenine dimethylase family protein ,DIM1A
511,AT4G32900,0.298953515,-0.790212484,4.11043418,16.69522971,0.000236961,0.008035344, Peptidyl-tRNA hydrolase II (PTH2) family protein ,NA
512,AT2G42200,0.259865934,0.203548661,4.911739829,16.68925257,0.00023767,0.008043653, squamosa promoter binding protein-like 9 ,AtSPL9;SPL9
513,AT4G14890,-0.381622295,-0.001789748,7.975519487,16.66892113,0.000240099,0.00811, 2Fe-2S ferredoxin-like superfamily protein ,FdC1
514,AT5G24990,-0.471896647,0.177372663,5.337170754,16.66500021,0.00024057,0.008110106, Protein of unknown function (DUF1336) ,NA
515,AT5G63420,-0.266690606,0.035899162,6.668589304,16.61836156,0.000246246,0.008285331, RNA-metabolising metallo-beta-lactamase family protein ,AtRNJ;emb2746
516,AT1G56300,-0.475190193,0.12436642,5.966045572,16.61257836,0.000246959,0.00829322, Chaperone DnaJ-domain superfamily protein ,NA
517,AT2G37460,0.571525003,0.05927417,3.141350581,16.60407923,0.00024801,0.008312428, nodulin MtN21 /EamA-like transporter family protein ,UMAMIT12
518,AT1G61740,0.346605604,0.067527428,6.356478549,16.56314864,0.000253138,0.008467918, Sulfite exporter TauE/SafE family protein ,NA
519,AT1G14120,2.128048102,0.047634494,0.250856468,16.55001958,0.000254806,0.008494382, 2-oxoglutarate (2OG) and Fe(II)-dependent oxygenase superfamily protein ,AtDAO2
520,AT3G18580,-0.981602972,0.636567168,2.684404776,16.54920076,0.00025491,0.008494382," Nucleic acid-binding, OB-fold-like protein ",NA
521,AT2G30600,-0.31471278,-0.099818649,7.016936575,16.54507078,0.000255437,0.008495604, BTB/POZ domain-containing protein ,NA
522,AT5G67100,0.232168075,0.107710834,5.421644689,16.51145679,0.000259766,0.008623045, DNA-directed DNA polymerases ,ICU2
523,AT4G16890,0.453835959,-0.277514043,6.28188983,16.49992723,0.000261268,0.008656316," disease resistance protein (TIR-NBS-LRR class), putative ",BAL;SNC1
524,AT2G32180,-0.368552186,-0.023129762,5.278787414,16.48254194,0.000263549,0.008715226, plastid transcriptionally active 18 ,PTAC18
525,AT3G48000,-0.184184096,-0.082102766,7.979739041,16.45716598,0.000266914,0.008809697, aldehyde dehydrogenase 2B4 ,ALDH2;ALDH2A;ALDH2B4
526,AT2G22240,0.521206098,-0.183573065,4.910769375,16.44942223,0.00026795,0.008827059, myo-inositol-1-phosphate synthase 2 ,ATIPS2;ATMIPS2;MIPS2
527,AT2G24270,0.309120666,-0.139869676,7.48113894,16.43527831,0.000269851,0.008872837, aldehyde dehydrogenase 11A3 ,ALDH11A3
528,AT5G22100,-0.650800044,0.226627834,3.797514812,16.42825791,0.0002708,0.008887173, RNA cyclase family protein ,NA
529,AT2G32990,0.878908696,-0.519979005,2.467266933,16.37119812,0.000278637,0.009127089, glycosyl hydrolase 9B8 ,AtGH9B8;GH9B8
530,AT5G60860,-0.692908946,0.040306261,2.371534685,16.36503704,0.000279497,0.009137974, RAB GTPase homolog A1F ,AtRABA1f;RABA1f
531,AT5G24120,0.673419772,-0.294448517,3.430463635,16.35887599,0.000280359,0.009148905, sigma factor E ,ATSIG5;SIG5;SIGE
532,AT1G67660,-0.436896117,0.126396158,4.989512064,16.33132073,0.000284249,0.009251237," Restriction endonuclease, type II-like superfamily protein ",NA
533,AT2G42900,-0.645515906,-0.632496576,1.461650909,16.32911116,0.000284563,0.009251237, Plant basic secretory protein (BSP) family protein ,NA
534,AT1G20340,-0.295899909,-0.090071527,11.2200219,16.27512953,0.000292348,0.009481581, Cupredoxin superfamily protein ,DRT112;PETE2
535,AT1G54050,-0.512463007,0.173627732,3.92816075,16.27012049,0.000293081,0.009481581, HSP20-like chaperones superfamily protein ,NA
536,AT3G05640,-0.427583192,-0.339643085,3.77099424,16.26869803,0.00029329,0.009481581, Protein phosphatase 2C family protein ,EGR1
537,AT1G77270,0.300631124,0.182588207,4.796116428,16.25365174,0.000295505,0.009535391, unknown protein; BEST Arabidopsis thaliana protein match is: unknown protein (TAIR:AT3G07730.1); Has 428 Blast hits to 388 proteins in 92 species: Archae - 0; Bacteria - 31; Metazoa - 189; Fungi - 10; Plants - 97; Viruses - 0; Other Eukaryotes - 101 (source: NCBI BLink). ,NA
538,AT2G47180,-1.708525823,0.096914378,1.857487241,16.24800838,0.00029634,0.009544561, galactinol synthase 1 ,AtGolS1;GolS1
539,AT1G26250,0.832593382,0.208185123,4.150884892,16.24317729,0.000297056,0.009548242, Proline-rich extensin-like family protein ,EXT18
540,AT3G09260,0.727790096,-0.246699198,5.75032109,16.23981614,0.000297556,0.009548242, Glycosyl hydrolase superfamily protein ,BGLU23;LEB;PSR3.1;PYK10
541,AT4G02850,-0.73246362,0.04704971,2.881597165,16.23383538,0.000298447,0.009559135, phenazine biosynthesis PhzC/PhzF family protein ,DAAR1
542,AT4G24540,0.417644222,-0.163999132,5.698991388,16.21050668,0.000301949,0.009653446, AGAMOUS-like 24 ,AGL24
543,AT1G35115,0.205035898,0.224458711,5.55780129,16.2039357,0.000302942,0.009667378, transposable element gene ,NA
544,AT1G19670,-0.701145569,-0.162814599,5.194563487,16.19104004,0.000304902,0.009712027, chlorophyllase 1 ,ATCLH1;ATHCOR1;CLH1;CORI1
545,AT1G64780,0.807020326,-0.446504349,3.386207605,16.16356366,0.00030912,0.009828306, ammonium transporter 1;2 ,AMT1;2;ATAMT1;2
546,AT5G45730,1.796651855,-0.566300346,0.95864745,16.15372441,0.000310644,0.009858688, Cysteine/Histidine-rich C1 domain family protein ,NA
547,AT1G67195,-0.705632601,0.37126615,4.337262546,16.1333789,0.00031382,0.009941282, MIR414 (MICRORNA 414) ,MIR414;sORF16
548,AT3G17210,-0.242926446,-0.088084351,5.887200522,16.1268402,0.000314848,0.009955636, heat stable protein 1 ,ATHS1;HS1
549,AT1G49500,-0.528811624,-0.638331208,2.301701179,16.03075632,0.000330343,0.010426573, unknown protein; FUNCTIONS IN: molecular_function unknown; INVOLVED IN: biological_process unknown; LOCATED IN: endomembrane system; EXPRESSED IN: 19 plant structures; EXPRESSED DURING: 10 growth stages; BEST Arabidopsis thaliana protein match is: unknown protein (TAIR:AT3G19030.1); Has 24 Blast hits to 24 proteins in 2 species: Archae - 0; Bacteria - 0; Metazoa - 0; Fungi - 0; Plants - 24; Viruses - 0; Other Eukaryotes - 0 (source: NCBI BLink). ,NA
550,AT1G62380,0.04125571,-0.452303504,6.291609205,16.0253802,0.000331232,0.01043563, ACC oxidase 2 ,ACO2;ATACO2
551,AT2G23010,-1.196184776,0.127337975,2.481626092,15.95958296,0.000342311,0.010765084, serine carboxypeptidase-like 9 ,SCPL9
552,AT5G25460,-0.11544667,-0.387177738,7.204699269,15.95482187,0.000343127,0.010771193," Protein of unknown function, DUF642 ",DGR2
553,AT4G00200,0.884527095,0.189579813,1.749786778,15.93071168,0.000347288,0.010865836, AT hook motif DNA-binding family protein ,AHL7
554,AT5G43740,-0.203583432,-0.459552801,3.636657723,15.93009201,0.000347396,0.010865836, Disease resistance protein (CC-NBS-LRR class) family ,NA
555,AT4G38950,0.279165599,0.071198188,7.16865485,15.92518674,0.000348249,0.010872892, ATP binding microtubule motor family protein ,NA
556,AT5G17710,-0.33969032,0.160539393,8.636105717,15.92002205,0.000349149,0.0108814, Co-chaperone GrpE family protein ,EMB1241
557,AT2G43150,0.788093445,0.126660843,6.079106268,15.87806351,0.000356552,0.011092146, Proline-rich extensin-like family protein ,NA
558,AT5G67460,0.493649244,-0.02817057,3.148060453,15.85876496,0.000360009,0.011179624, O-Glycosyl hydrolases family 17 protein ,NA
559,AT3G05880,-0.617017194,0.277231211,5.101490443,15.85267292,0.000361107,0.011193669, Low temperature and salt responsive protein family ,RCI2A
560,ATCG00540,-1.040165177,1.53897981,3.697774179,15.84530878,0.000362439,0.011214898, photosynthetic electron transfer A ,PETA
561,AT3G27850,-0.250497211,-0.009036217,8.213461245,15.83830339,0.000363711,0.011234188, ribosomal protein L12-C ,RPL12-C
562,AT1G07985,-1.561699548,0.77401944,1.480117859,15.82896137,0.000365414,0.011266703, Expressed protein ,NA
563,AT2G43520,2.134807498,-1.547822807,0.646937611,15.81211063,0.000368505,0.011337232, trypsin inhibitor protein 2 ,ATTI2;TI2
564,AT2G38940,-1.08871116,0.094225637,1.918988043,15.80937556,0.00036901,0.011337232, phosphate transporter 1;4 ,ATPT2;PHT1;4
565,AT1G04050,0.510714328,0.23495032,2.26491841,15.78353511,0.000373808,0.011464336, homolog of SU(var)3-9 1 ,SDG13;SUVR1
566,AT5G25840,-0.216104012,-0.430236836,4.567421673,15.77777466,0.000374886,0.01147709, Protein of unknown function (DUF1677) ,NA
567,AT3G53800,-0.406070207,0.053567043,5.259715523,15.76660755,0.000376986,0.011520997, Fes1B ,Fes1B
568,AT4G30960,0.283614381,0.031559376,7.759158482,15.75265569,0.000379625,0.011581222, SOS3-interacting protein 3 ,ATCIPK6;CIPK6;SIP3;SNRK3.14
569,AT3G59100,0.411134025,-0.180813913,4.841140384,15.72976715,0.000383994,0.011693934, glucan synthase-like 11 ,ATGSL11;gsl11;GSL11
570,AT1G72300,0.515358317,-0.026588254,3.166174649,15.69530177,0.000390669,0.011876326, Leucine-rich receptor-like protein kinase family protein ,PSY1R
571,AT4G31530,-0.183684846,-0.173393717,5.235122994,15.57962651,0.00041393,0.01256144, NAD(P)-binding Rossmann-fold superfamily protein ,NA
572,AT5G13840,0.180515829,0.161185151,5.341842458,15.57119348,0.000415679,0.012592464, FIZZY-related 3 ,CCS52B;FZR3
573,AT1G78380,-0.241178456,-0.01618557,7.594794694,15.56502724,0.000416963,0.012609303, glutathione S-transferase TAU 19 ,ATGSTU19;GST8;GSTU19
574,AT1G26560,0.407053967,0.035129532,4.779867259,15.55298783,0.00041948,0.012663337, beta glucosidase 40 ,BGLU40
575,AT1G73010,0.486263692,2.079013406,0.50197144,15.52308344,0.0004258,0.012831749, phosphate starvation-induced gene 2 ,AtPPsPase1;ATPS2;PPsPase1;PS2
576,AT3G55646,-0.374031013,-1.067352736,1.817288209,15.50272812,0.000430155,0.012922536, unknown protein; FUNCTIONS IN: molecular_function unknown; INVOLVED IN: biological_process unknown; LOCATED IN: chloroplast; BEST Arabidopsis thaliana protein match is: unknown protein (TAIR:AT2G39855.2); Has 35333 Blast hits to 34131 proteins in 2444 species: Archae - 798; Bacteria - 22429; Metazoa - 974; Fungi - 991; Plants - 531; Viruses - 0; Other Eukaryotes - 9610 (source: NCBI BLink). ,NA
577,AT1G61580,0.243227554,0.30307545,5.338709234,15.50203844,0.000430304,0.012922536, R-protein L3 B ,ARP2;RPL3B
578,AT4G39350,-0.193898183,-0.047697937,7.57281818,15.47515,0.000436128,0.013002242, cellulose synthase A2 ,ATCESA2;ATH-A;CESA2
579,AT5G09460,0.32315532,-0.108811436,4.721533429,15.47248398,0.00043671,0.013002242, sequence-specific DNA binding transcription factors;transcription regulators ,SACL1
580,AT5G09461,0.32315532,-0.108811436,4.721533429,15.47248398,0.00043671,0.013002242, conserved peptide upstream open reading frame 43 ,NA
581,AT5G09462,0.32315532,-0.108811436,4.721533429,15.47248398,0.00043671,0.013002242, conserved peptide upstream open reading frame 42 ,NA
582,AT5G09463,0.32315532,-0.108811436,4.721533429,15.47248398,0.00043671,0.013002242, conserved peptide upstream open reading frame 41 ,NA
583,AT1G03420,-0.009275222,0.609877372,4.151096062,15.4581756,0.000439845,0.013073134, transposable element gene ,Sadhu4-2
584,AT3G52310,-0.772672712,-1.130239639,0.463245817,15.43946686,0.000443979,0.013173402, ABC-2 type transporter family protein ,ABCG27
585,AT3G61100,-0.66400296,0.278144916,3.584077434,15.41071072,0.000450409,0.013341334, Putative endonuclease or glycosyl hydrolase ,NA
586,AT3G53460,-0.332524621,0.188243725,11.43874476,15.37827765,0.000457772,0.013536309, chloroplast RNA-binding protein 29 ,CP29
587,AT5G42270,-0.22750254,-0.022399347,9.916506144,15.36334799,0.000461202,0.0136145, FtsH extracellular protease family ,FTSH5;VAR1
588,AT1G11440,-0.367188216,-0.23825126,4.349625632,15.35166866,0.000463903,0.013670948, BEST Arabidopsis thaliana protein match is: glycine-rich protein (TAIR:AT3G29075.1); Has 19337 Blast hits to 8589 proteins in 488 species: Archae - 26; Bacteria - 641; Metazoa - 7852; Fungi - 2167; Plants - 955; Viruses - 616; Other Eukaryotes - 7080 (source: NCBI BLink). ,NA
589,AT2G16270,0.387906914,0.018355768,4.386483996,15.33087647,0.000468751,0.01379036, unknown protein; FUNCTIONS IN: molecular_function unknown; INVOLVED IN: biological_process unknown; LOCATED IN: chloroplast; EXPRESSED IN: 16 plant structures; EXPRESSED DURING: 9 growth stages; BEST Arabidopsis thaliana protein match is: unknown protein (TAIR:AT1G16630.1); Has 1844 Blast hits to 1256 proteins in 271 species: Archae - 6; Bacteria - 283; Metazoa - 434; Fungi - 153; Plants - 91; Viruses - 52; Other Eukaryotes - 825 (source: NCBI BLink). ,NA
590,AT1G67900,-0.086234302,-0.363974957,5.984397448,15.324257,0.000470305,0.013792897, Phototropic-responsive NPH3 family protein ,NA
591,AT3G06455,0.77565252,-0.277066015,2.806301076,15.32372898,0.000470429,0.013792897, ubiquitin family protein ,NA
592,AT1G65295,-0.224989607,-0.324731725,4.279504468,15.30838248,0.000474053,0.013875662, unknown protein; LOCATED IN: endomembrane system; EXPRESSED IN: 22 plant structures; EXPRESSED DURING: 13 growth stages; BEST Arabidopsis thaliana protein match is: unknown protein (TAIR:AT5G01015.1); Has 90 Blast hits to 90 proteins in 15 species: Archae - 0; Bacteria - 0; Metazoa - 0; Fungi - 0; Plants - 90; Viruses - 0; Other Eukaryotes - 0 (source: NCBI BLink). ,NA
593,AT4G23010,-0.657781453,-0.032975301,3.132837202,15.26219965,0.000485127,0.014175853, UDP-galactose transporter 2 ,ATUTR2;UTR2
594,AT4G31000,0.325109766,0.104436008,4.66909891,15.25418479,0.000487075,0.014208815, Calmodulin-binding protein ,NA
595,AT4G37080,-0.374147153,0.426148048,6.069937114,15.24410027,0.000489537,0.014256639," Protein of unknown function, DUF547 ",NA
596,AT1G31550,-1.519453322,0.91495861,2.35510636,15.21543575,0.000496604,0.014438174, GDSL-like Lipase/Acylhydrolase superfamily protein ,NA
597,AT1G12480,0.142145401,-1.674275698,1.669758948,15.20518553,0.000499156,0.014488053, C4-dicarboxylate transporter/malic acid transport protein ,CDI3;OZS1;RCD3;SLAC1
598,AT5G58310,-1.636040405,-1.56229023,0.391943145,15.18504936,0.000504206,0.014610184, methyl esterase 18 ,ATMES18;MES18
599,AT1G23935,0.714705922,-0.006352476,3.131469916,15.17491341,0.000506768,0.014659901, CONTAINS InterPro DOMAIN/s: Apoptosis inhibitory 5 (InterPro:IPR008383); BEST Arabidopsis thaliana protein match is: unknown protein (TAIR:AT3G19515.2); Has 219 Blast hits to 219 proteins in 67 species: Archae - 0; Bacteria - 0; Metazoa - 128; Fungi - 0; Plants - 77; Viruses - 0; Other Eukaryotes - 14 (source: NCBI BLink). ,NA
600,AT4G17245,-0.645719704,0.186261472,3.771776232,15.16997094,0.000508022,0.01467168, RING/U-box superfamily protein ,NA
601,AT1G15550,-0.814380315,0.157279346,2.626347884,15.13697087,0.000516474,0.014890953, gibberellin 3-oxidase 1 ,ATGA3OX1;GA3OX1;GA4
602,AT1G02190,0.838796072,0.168871945,1.6423015,15.12706014,0.00051904,0.014940068, Fatty acid hydroxylase superfamily ,CER1-L1
603,AT1G15110,0.587331241,-0.008401499,2.892161036,15.12162251,0.000520453,0.014951268, phosphatidyl serine synthase family protein ,AtPSS1;PSS1
604,AT3G16950,-0.414052928,0.247731861,5.473946976,15.11315903,0.00052266,0.014951268, lipoamide dehydrogenase 1 ,LPD1;ptlpd1
605,AT3G12810,0.29160906,0.017781383,5.921792738,15.11100499,0.000523223,0.014951268, SNF2 domain-containing protein / helicase domain-containing protein ,chr13;PIE1;SRCAP
606,AT3G04740,0.399801248,-0.188271608,4.478153827,15.10819486,0.000523959,0.014951268, RNA polymerase II transcription mediators ,ATMED14;MED14;SWP
607,AT1G21600,-0.249356151,0.047961204,8.130407946,15.1060278,0.000524527,0.014951268, plastid transcriptionally active 6 ,PTAC6
608,AT5G52070,-0.504403145,-0.169597552,4.009727352,15.10572655,0.000524606,0.014951268, Agenet domain-containing protein ,NA
609,AT4G23900,0.837237215,-0.235668765,1.906230439,15.08000135,0.000531397,0.015119954, Nucleoside diphosphate kinase family protein ,NA
610,AT2G43060,-0.643400288,-0.266813098,2.252318955,15.07555225,0.000532581,0.015127237, ILI1 binding bHLH 1 ,AtIBH1;IBH1
611,AT2G47010,0.950034664,-0.068437264,1.605305431,15.07248075,0.000533399,0.015127237, unknown protein; FUNCTIONS IN: molecular_function unknown; INVOLVED IN: biological_process unknown; LOCATED IN: endomembrane system; EXPRESSED IN: 17 plant structures; EXPRESSED DURING: 10 growth stages; BEST Arabidopsis thaliana protein match is: unknown protein (TAIR:AT1G17030.1); Has 72 Blast hits to 72 proteins in 13 species: Archae - 0; Bacteria - 0; Metazoa - 0; Fungi - 0; Plants - 71; Viruses - 0; Other Eukaryotes - 1 (source: NCBI BLink). ,NA
612,AT5G48220,-0.190228144,-0.156954008,5.954819431,15.05535531,0.000537986,0.015232393, Aldolase-type TIM barrel family protein ,NA
613,AT5G26570,-0.169417195,-0.178610704,7.207699287,15.0285736,0.000545239,0.015412556," catalytics;carbohydrate kinases;phosphoglucan, water dikinases ",ATGWD3;OK1;PWD
614,AT1G13440,0.276141191,-0.089547713,8.78125215,15.02203847,0.000547023,0.015437816, glyceraldehyde-3-phosphate dehydrogenase C2 ,GAPC-2;GAPC2
615,AT5G36670,7.932756154,-13.08414625,1.99235716,15.0154308,0.000548834,0.015463719, RING/FYVE/PHD zinc finger superfamily protein ,NA
616,AT3G63440,0.477602139,-0.119139038,4.063964449,15.00293568,0.000552273,0.015535371, cytokinin oxidase/dehydrogenase 6 ,ATCKX6;ATCKX7;CKX6
617,AT4G35900,0.503951788,0.398398789,2.498254627,14.99600027,0.000554192,0.015564071, Basic-leucine zipper (bZIP) transcription factor family protein ,atbzip14;FD;FD-1
618,AT4G36670,-0.020764314,-0.885781076,2.622113227,14.98549171,0.000557111,0.015620746, Major facilitator superfamily protein ,AtPLT6;AtPMT6;PLT6;PMT6
619,AT5G51010,-0.406505725,-0.059940367,5.678444168,14.98153383,0.000558215,0.015626404, Rubredoxin-like superfamily protein ,NA
620,AT2G38210,-2.070636546,1.929699651,1.334985183,14.97181171,0.000560935,0.015677223, putative PDX1-like protein 4 ,PDX1L4
621,AT5G16350,-1.310461399,0.359372256,1.112034079,14.95448364,0.000565816,0.015771609, O-acyltransferase (WSD1-like) family protein ,NA
622,AT3G45780,-0.120234496,-0.191222608,8.030428693,14.95336543,0.000566132,0.015771609, phototropin 1 ,JK224;NPH1;PHOT1;RPT1
623,AT3G57230,0.649569101,-0.870951496,3.27332369,14.92830598,0.00057327,0.015944832, AGAMOUS-like 16 ,AGL16
624,AT2G30740,0.361325397,0.182441464,3.876686011,14.86768517,0.000590913,0.016409186, Protein kinase superfamily protein ,NA
625,AT1G24260,1.169887474,2.417729474,0.294171847,14.86357632,0.000592128,0.016416623, K-box region and MADS-box transcription factor family protein  ,AGL9;SEP3
626,AT1G60270,-0.908994488,0.313297014,3.421551802,14.83445954,0.000600811,0.016630762, beta glucosidase 6 ,BGLU6
627,AT2G21385,-0.229492961,-0.040887599,7.789505564,14.82543095,0.00060353,0.016679363, unknown protein. ,AtCGLD11;BFA3;CGLD11
628,AT4G30190,0.383911235,-0.202886654,7.63237334,14.79378569,0.000613155,0.01691246, H(+)-ATPase 2 ,AHA2;AtHA2;HA2;PMA2
629,AT2G36790,-0.649946564,0.306366164,3.820518268,14.79130473,0.000613916,0.01691246, UDP-glucosyl transferase 73C6 ,UGT73C6
630,AT1G34355,0.45266971,0.007573678,3.751805442,14.7562193,0.000624781,0.017184448, forkhead-associated (FHA) domain-containing protein  ,ATPS1;PS1
631,AT1G13260,0.572503941,-0.187427371,3.981957614,14.74794464,0.000627371,0.017228346, related to ABI3/VP1 1 ,AtRAV1;EDF4;RAV1
632,AT2G37220,-0.260828166,0.092544094,9.972710099,14.73076418,0.000632784,0.017349484, RNA-binding (RRM/RBD/RNP motifs) family protein ,NA
633,AT3G14560,-0.831334033,1.198318133,2.718627974,14.69147862,0.000645336,0.017655694, unknown protein; Has 6 Blast hits to 6 proteins in 3 species: Archae - 0; Bacteria - 0; Metazoa - 0; Fungi - 0; Plants - 6; Viruses - 0; Other Eukaryotes - 0 (source: NCBI BLink). ,NA
634,AT1G74430,0.462948506,0.483874396,2.408692734,14.68824026,0.000646382,0.017655694, myb domain protein 95 ,ATMYB95;ATMYBCP66;MYB95
635,AT2G35930,-0.896843731,0.049851814,2.06818904,14.68630178,0.000647009,0.017655694, plant U-box 23 ,AtPUB23;PUB23
636,AT1G10300,1.142316098,1.416610063,0.471015595,14.67206746,0.00065163,0.017753842, Nucleolar GTP-binding protein ,Nog1-2
637,AT5G49730,0.590625723,-0.234976247,6.769438693,14.63985506,0.00066221,0.018013781, ferric reduction oxidase 6 ,ATFRO6;FRO6
638,AT5G14120,-0.282112166,-0.17089222,6.035929696,14.635885,0.000663526,0.018021283, Major facilitator superfamily protein ,NA
639,AT1G69040,-0.355645886,0.119351998,5.90324295,14.62836662,0.000666025,0.018052597, ACT domain repeat 4 ,ACR4
640,AT5G14840,-0.504168398,0.194792372,5.053274928,14.62615306,0.000666763,0.018052597, pseudogene of unknown protein ,NA
641,AT3G22550,1.153919683,-0.596339116,1.992407736,14.5466159,0.000693813,0.018755684, Protein of unknown function (DUF581) ,NA
642,AT4G14690,-0.904651764,-0.708607975,1.247414781,14.53942367,0.000696313,0.018793933, Chlorophyll A-B binding family protein ,ELIP2
643,AT2G03420,-0.369501486,0.182533643,6.206640198,14.52070143,0.000702861,0.018941188, unknown protein; Has 38 Blast hits to 38 proteins in 17 species: Archae - 0; Bacteria - 0; Metazoa - 0; Fungi - 0; Plants - 38; Viruses - 0; Other Eukaryotes - 0 (source: NCBI BLink). ,NA
644,AT3G13710,-0.465458802,-0.240744679,2.602124377,14.50999291,0.000706635,0.019013306, prenylated RAB acceptor 1.F4 ,PRA1.F4
645,AT5G61850,1.64205014,-0.879093133,1.563145102,14.50076994,0.000709901,0.019071574, floral meristem identity control protein LEAFY (LFY) ,LFY;LFY3
646,AT4G36580,-0.706724907,0.543423202,3.464123096,14.48526078,0.000715427,0.019190289, AAA-type ATPase family protein ,NA
647,AT5G18600,-0.047478579,-0.525534949,5.217558794,14.44561816,0.00072975,0.019544206, Thioredoxin superfamily protein ,ROXY10
648,AT2G32650,-0.40269332,0.160008649,4.716204509,14.419329,0.000739405,0.019756115, RmlC-like cupins superfamily protein ,NA
649,AT3G05165,-0.633183111,0.195907891,3.865422206,14.41787697,0.000739942,0.019756115, Major facilitator superfamily protein ,NA
650,AT4G08330,-2.019781803,1.448917193,1.019997087,14.37191394,0.000757144,0.020184297, unknown protein; FUNCTIONS IN: molecular_function unknown; INVOLVED IN: biological_process unknown; LOCATED IN: plasma membrane; EXPRESSED IN: 24 plant structures; EXPRESSED DURING: 14 growth stages; BEST Arabidopsis thaliana protein match is: unknown protein (TAIR:AT2G17705.1); Has 98 Blast hits to 98 proteins in 13 species: Archae - 0; Bacteria - 0; Metazoa - 0; Fungi - 0; Plants - 98; Viruses - 0; Other Eukaryotes - 0 (source: NCBI BLink). ,NA
651,AT1G13270,-0.301547796,0.163188987,6.654510548,14.36692133,0.000759037,0.020203663, methionine aminopeptidase 1B ,MAP1B;MAP1C
652,AT3G13470,-0.317418958,0.05856606,8.645589973,14.33110727,0.000772751,0.020537163, TCP-1/cpn60 chaperonin family protein ,Cpn60beta2;CPNB2
653,AT1G62780,-0.333015959,0.134275456,6.987844732,14.3141922,0.000779314,0.020679875," unknown protein; FUNCTIONS IN: molecular_function unknown; INVOLVED IN: biological_process unknown; LOCATED IN: chloroplast, chloroplast stroma; EXPRESSED IN: 22 plant structures; EXPRESSED DURING: 14 growth stages; Has 94 Blast hits to 94 proteins in 35 species: Archae - 6; Bacteria - 10; Metazoa - 21; Fungi - 2; Plants - 48; Viruses - 0; Other Eukaryotes - 7 (source: NCBI BLink). ",NA
654,AT4G22513,-0.691967645,0.358223468,4.677729812,14.29824494,0.000785553,0.020813554, Bifunctional inhibitor/lipid-transfer protein/seed storage 2S albumin superfamily protein ,NA
655,AT1G31835,-1.497965059,0.899980117,1.64958754,14.267814,0.000797597,0.0211004, unknown protein; FUNCTIONS IN: molecular_function unknown; INVOLVED IN: biological_process unknown; LOCATED IN: endomembrane system; Has 35333 Blast hits to 34131 proteins in 2444 species: Archae - 798; Bacteria - 22429; Metazoa - 974; Fungi - 991; Plants - 531; Viruses - 0; Other Eukaryotes - 9610 (source: NCBI BLink). ,NA
656,AT3G51450,-0.796856978,-0.272798217,2.183696457,14.24889046,0.00080518,0.021268524, Calcium-dependent phosphotriesterase superfamily protein ,NA
657,AT4G20890,-0.281293713,0.119399756,6.18210135,14.23347024,0.000811412,0.021400518, tubulin beta-9 chain ,TUB9
658,AT5G45040,-0.571355556,0.414471481,4.183583819,14.21754781,0.000817897,0.021538788, Cytochrome c ,CYTC6A
659,AT3G21560,-0.436124135,0.289162153,6.218613853,14.21160347,0.000820332,0.021570119, UDP-Glycosyltransferase superfamily protein ,BRT1;UGT84A2
660,AT5G27440,-0.77076612,0.902176123,3.067268145,14.2016882,0.000824409,0.021644477," unknown protein; FUNCTIONS IN: molecular_function unknown; INVOLVED IN: biological_process unknown; LOCATED IN: chloroplast; EXPRESSED IN: shoot apex, shoot, flower, seed; EXPRESSED DURING: petal differentiation and expansion stage, E expanded cotyledon stage; Has 1807 Blast hits to 1807 proteins in 277 species: Archae - 0; Bacteria - 0; Metazoa - 736; Fungi - 347; Plants - 385; Viruses - 0; Other Eukaryotes - 339 (source: NCBI BLink). ",NA
661,AT5G45430,2.572851965,-0.420315513,4.179473662,14.19545504,0.000826982,0.021679192, Protein kinase superfamily protein ,NA
662,ATMG00020,-1.463412771,1.397601602,7.254959022,14.16504251,0.000839653,0.021978121, mitochondrial 26S ribosomal RNA protein ,RRN26
663,AT4G16340,0.301517627,-0.152028626,6.512728943,14.13928298,0.000850538,0.022223148, guanyl-nucleotide exchange factors;GTPase binding;GTP binding ,SPK1
664,AT3G17930,-0.189631393,-0.03249186,8.014510207,14.13683534,0.00085158,0.022223148, unknown protein; FUNCTIONS IN: molecular_function unknown; INVOLVED IN: biological_process unknown; LOCATED IN: chloroplast thylakoid membrane; EXPRESSED IN: 22 plant structures; EXPRESSED DURING: 13 growth stages; CONTAINS InterPro DOMAIN/s: Protein of unknown function DUF3007 (InterPro:IPR021562); Has 236 Blast hits to 236 proteins in 83 species: Archae - 0; Bacteria - 117; Metazoa - 0; Fungi - 0; Plants - 39; Viruses - 0; Other Eukaryotes - 80 (source: NCBI BLink). ,DAC
665,AT3G30665,-0.107298482,1.762915738,1.072527371,14.1144489,0.000861165,0.022439499, transposable element gene ,NA
666,AT1G35710,1.865294818,-0.832475478,1.985014211,14.10925422,0.000863405,0.022464077, Protein kinase family protein with leucine-rich repeat domain ,NA
667,AT5G08280,-0.218049198,-0.04277559,8.782506344,14.09340142,0.000870276,0.02258924, hydroxymethylbilane synthase ,HEMC;RUG1
668,AT1G15000,-0.481421306,0.26229409,5.393592972,14.09214475,0.000870823,0.02258924, serine carboxypeptidase-like 50 ,scpl50
669,AT3G11280,-0.173175263,-0.647300261,3.775181467,14.06935654,0.000880801,0.022813944, Duplicated homeodomain-like superfamily protein ,NA
670,AT1G01470,-0.837284501,0.513718216,2.666221301,14.0625008,0.000883826,0.022858114, Late embryogenesis abundant protein ,AtLEA14;LEA1;LEA14;LSR3
671,AT3G56020,-0.452113025,0.030896078,5.9027163,14.05003044,0.000889354,0.022966805, Ribosomal protein L41 family ,NA
672,AT5G54080,-1.046864294,1.335891344,1.526659451,13.98704939,0.000917806,0.023654323," homogentisate 1,2-dioxygenase ",AtHGO;HGO
673,AT3G10970,-0.147564631,-0.161695951,5.960625379,13.98508605,0.000918707,0.023654323, Haloacid dehalogenase-like hydrolase (HAD) superfamily protein ,NA
674,AT5G45275,0.281218896,0.503130592,3.282676222,13.96899217,0.00092613,0.023810057, Major facilitator superfamily protein ,NA
675,AT1G53140,0.391173152,-0.00514619,4.395757254,13.95425241,0.000932981,0.023950247, Dynamin related protein 5A ,DRP5A
676,AT3G19184,1.467550943,-0.199407212,0.918970483,13.95132505,0.000934347,0.023950247, AP2/B3-like transcriptional factor family protein ,NA
677,AT2G06520,-0.285778896,-0.089130265,8.512397551,13.94834739,0.000935739,0.023950502, photosystem II subunit X ,PSBX
678,AT5G52780,-0.526674949,0.050161403,3.84224993,13.92995886,0.000944382,0.024136073, Protein of unknown function (DUF3464) ,NA
679,AT1G70020,-1.195528153,-0.179098524,0.586553472,13.90770266,0.00095495,0.024370217, Protein of unknown function (DUF1163) ,NA
680,AT1G16260,0.366007729,0.205316696,3.35666829,13.89825753,0.000959471,0.024432275, Wall-associated kinase family protein ,NA
681,AT3G62860,-0.600440327,-0.975053695,0.767756844,13.89673384,0.000960202,0.024432275, alpha/beta-Hydrolases superfamily protein ,MAGL12
682,AT1G44575,-0.191047281,-0.101196956,9.708078576,13.88616875,0.000965288,0.024508858, Chlorophyll A-B binding family protein ,CP22;NPQ4;PSBS
683,AT5G47110,-0.270791243,0.028833221,6.97872531,13.88452711,0.00096608,0.024508858, Chlorophyll A-B binding family protein ,LIL3:2
684,AT5G55120,-0.515150437,0.364702697,5.512388206,13.88168344,0.000967455,0.024508858, galactose-1-phosphate guanylyltransferase (GDP)s;GDP-D-glucose phosphorylases;quercetin 4'-O-glucosyltransferases ,VTC5
685,AT1G41830,-0.258995243,0.038462997,6.20678196,13.85794388,0.000979007,0.0247653, SKU5-similar 6 ,SKS6
686,AT5G28020,-0.63876586,0.12518549,3.076504106,13.85144705,0.000982192,0.02480966, cysteine synthase D2 ,ATCYSD2;CYSD2
687,AT4G14880,-0.244522134,-0.058988905,8.046035538,13.83282394,0.000991381,0.025005305, O-acetylserine (thiol) lyase (OAS-TL) isoform A1 ,ATCYS-3A;CYTACS1;OASA1;OLD3
688,AT5G44005,-1.313695147,0.236268758,1.268099038,13.81891498,0.000998299,0.025143211, unknown protein; FUNCTIONS IN: molecular_function unknown; INVOLVED IN: biological_process unknown; LOCATED IN: plasma membrane; Has 35333 Blast hits to 34131 proteins in 2444 species: Archae - 798; Bacteria - 22429; Metazoa - 974; Fungi - 991; Plants - 531; Viruses - 0; Other Eukaryotes - 9610 (source: NCBI BLink). ,NA
689,AT1G76185,-0.531727705,1.603268037,1.751737542,13.81008062,0.001002719,0.02519013, unknown protein; BEST Arabidopsis thaliana protein match is: unknown protein (TAIR:AT1G20460.1); Has 37 Blast hits to 37 proteins in 11 species: Archae - 0; Bacteria - 0; Metazoa - 0; Fungi - 0; Plants - 37; Viruses - 0; Other Eukaryotes - 0 (source: NCBI BLink). ,NA
690,AT1G17665,-0.663992623,0.151749567,2.91481624,13.80938081,0.00100307,0.02519013, unknown protein; FUNCTIONS IN: molecular_function unknown; INVOLVED IN: biological_process unknown; LOCATED IN: endomembrane system; EXPRESSED IN: 15 plant structures; EXPRESSED DURING: 11 growth stages; Has 149 Blast hits to 146 proteins in 39 species: Archae - 0; Bacteria - 4; Metazoa - 21; Fungi - 5; Plants - 30; Viruses - 0; Other Eukaryotes - 89 (source: NCBI BLink). ,NA
691,AT2G33810,0.450256054,0.042959947,4.174456472,13.80558466,0.001004975,0.025201464, squamosa promoter binding protein-like 3 ,SPL3
692,AT3G26740,-0.408298264,-0.073005571,7.812712598,13.80235699,0.001006598,0.025205691, CCR-like ,CCL
693,AT5G37020,0.276386467,0.160983595,4.936367692,13.78732915,0.00101419,0.02530549, auxin response factor 8 ,ARF8;ATARF8
694,AT1G11840,0.335560244,-0.161563697,7.360939485,13.78723471,0.001014238,0.02530549, glyoxalase I homolog ,ATGLX1;AtGLYI3;GLX1
695,AT5G24770,-0.920236287,-1.131202895,6.361230257,13.78580205,0.001014965,0.02530549, vegetative storage protein 2 ,ATVSP2;VSP2
696,AT2G29260,-1.588674109,1.248436009,1.226529968,13.74848868,0.001034079,0.025726168, NAD(P)-binding Rossmann-fold superfamily protein ,NA
697,AT3G25290,0.681337231,0.21352506,1.76693524,13.74708033,0.001034807,0.025726168, Auxin-responsive family protein ,NA
698,AT3G47380,-0.621371129,-0.125383331,3.084032042,13.73403223,0.00104158,0.025857457, Plant invertase/pectin methylesterase inhibitor superfamily protein ,AtPMEI11
699,AT1G32640,-0.757957408,-0.10471586,5.38088083,13.71903851,0.001049418,0.026014765, Basic helix-loop-helix (bHLH) DNA-binding family protein ,ATMYC2;JAI1;JIN1;MYC2;RD22BP1;ZBF1
700,AT3G56210,0.165593317,0.175565742,4.708123204,13.71116101,0.00105356,0.026080122, ARM repeat superfamily protein ,NA
701,AT1G45191,0.735575473,-0.220126281,3.067883411,13.70198595,0.001058404,0.026162665, Glycosyl hydrolase superfamily protein ,BGLU1
702,AT1G12820,0.230530305,0.162585594,5.312822054,13.69617527,0.001061484,0.02620141, auxin signaling F-box 3 ,AFB3
703,AT4G39330,0.208514632,-0.003744844,8.635610255,13.69161631,0.001063906,0.026223847, cinnamyl alcohol dehydrogenase 9 ,ATCAD9;CAD9
704,AT5G51850,0.554305772,-0.356536677,3.640961463,13.68303513,0.001068481,0.026299195, unknown protein; BEST Arabidopsis thaliana protein match is: unknown protein (TAIR:AT5G62170.1); Has 384 Blast hits to 375 proteins in 79 species: Archae - 0; Bacteria - 14; Metazoa - 135; Fungi - 31; Plants - 92; Viruses - 0; Other Eukaryotes - 112 (source: NCBI BLink). ,TRM24
705,AT1G18630,0.19331575,-0.889521948,2.891036483,13.67524744,0.001072649,0.026337687, glycine-rich RNA-binding protein 6 ,GR-RBP6;RBGA1
706,AT4G19380,-0.58957014,0.284144958,4.082462282,13.67443624,0.001073084,0.026337687, Long-chain fatty alcohol dehydrogenase family protein ,NA
707,AT2G28605,-0.426935411,0.055609953,4.729700246,13.65694724,0.001082509,0.026531427, Photosystem II reaction center PsbP family protein ,NA
708,AT4G34920,-0.218122581,-0.315388001,4.455222675,13.63585622,0.001093985,0.026774824, PLC-like phosphodiesterases superfamily protein ,NA
709,AT5G44670,0.342079076,-0.057497123,4.487094472,13.61779479,0.001103909,0.026979608, Domain of unknown function (DUF23) ,GALS2
710,AT3G04730,-0.100837858,-0.296108184,5.380303872,13.59170156,0.001118406,0.027295408, indoleacetic acid-induced protein 16 ,IAA16
711,AT2G41410,0.45208043,-0.250165735,5.88350929,13.56383963,0.001134096,0.027639392, Calcium-binding EF-hand family protein ,NA
712,AT5G23940,0.154398279,0.177270862,7.438753206,13.56003459,0.001136255,0.027653133, HXXXD-type acyl-transferase family protein ,DCR;EMB3009;PEL3
713,AT4G23550,-1.003233481,0.161688239,1.480878347,13.55050021,0.001141685,0.027746306, WRKY family transcription factor ,ATWRKY29;WRKY29
714,AT4G30910,0.414234514,0.066471573,4.11785203,13.53476657,0.001150702,0.027910057, Cytosol aminopeptidase family protein ,NA
715,AT4G12970,-0.495816867,-0.026858031,3.485309105,13.53312924,0.001151644,0.027910057, stomagen ,AtEPFL9;EPFL9;STOMAGEN
716,AT3G58900,1.05219161,-0.912013171,2.571178741,13.52317696,0.001157389,0.028010112, F-box/RNI-like superfamily protein ,NA
717,AT1G57770,-0.271282737,-0.062535599,5.208423368,13.52030768,0.001159051,0.028011204, FAD/NAD(P)-binding oxidoreductase family protein ,NA
718,AT1G60989,-0.899383235,-0.139518804,1.313314403,13.50378849,0.001168664,0.028204187, SCR-like 7 ,SCRL7
719,AT2G33450,-0.169717514,-0.149502311,7.721600846,13.49920829,0.001171343,0.028229534, Ribosomal L28 family ,PRPL28
720,AT1G66760,-0.591560588,-0.258994252,2.847787528,13.48387542,0.001180358,0.028407276, MATE efflux family protein ,NA
721,AT1G74040,-0.219163585,-0.073134609,5.606987774,13.4793742,0.001183017,0.028431794, 2-isopropylmalate synthase 1 ,IMS1;IPMS2;MAML-3
722,AT1G36390,-0.285169624,0.055730654,6.316254478,13.47125846,0.001187828,0.028507861, Co-chaperone GrpE family protein ,NA
723,AT1G10760,-0.235609017,-0.169665,7.857893324,13.43025481,0.001212432,0.02905811," Pyruvate phosphate dikinase, PEP/pyruvate binding domain ",GWD;GWD1;SEX1;SOP;SOP1
724,AT3G02360,0.287379504,-0.088153697,6.192900246,13.42493019,0.001215664,0.029095332, 6-phosphogluconate dehydrogenase family protein ,PGD2
725,AT1G06570,0.337765334,-0.041984676,4.994376159,13.41987655,0.001218739,0.029128711, phytoene desaturation 1 ,HPD;HPPD;PDS1
726,AT4G09040,-0.249118721,0.060810377,7.628431759,13.40852,0.001225679,0.029254232, RNA-binding (RRM/RBD/RNP motifs) family protein ,NA
727,AT2G30420,-1.577986024,0.819749695,0.884292944,13.40441913,0.001228195,0.029273955, Homeodomain-like superfamily protein ,ETC2
728,AT5G36700,-0.184524791,-0.117090436,7.343826971,13.35333852,0.001259968,0.029803622, 2-phosphoglycolate phosphatase 1 ,ATPGLP1;PGLP1
729,AT5G36790,-0.184524511,-0.117090664,7.343826971,13.35239098,0.001260565,0.029803622, Haloacid dehalogenase-like hydrolase (HAD) superfamily protein ,NA
730,AT3G53668,0.21798317,0.223660086,4.014440379,13.35091574,0.001261495,0.029803622, conserved peptide upstream open reading frame 51 ,NA
731,AT3G53670,0.217983175,0.22366012,4.014440379,13.35088731,0.001261513,0.029803622, unknown protein; BEST Arabidopsis thaliana protein match is: unknown protein (TAIR:AT2G37480.1); Has 176 Blast hits to 173 proteins in 30 species: Archae - 0; Bacteria - 0; Metazoa - 8; Fungi - 13; Plants - 154; Viruses - 0; Other Eukaryotes - 1 (source: NCBI BLink). ,NA
732,AT5G55790,-0.631023101,-0.243523055,2.125682606,13.34958888,0.001262332,0.029803622, unknown protein; BEST Arabidopsis thaliana protein match is: unknown protein (TAIR:AT1G45163.1); Has 1807 Blast hits to 1807 proteins in 277 species: Archae - 0; Bacteria - 0; Metazoa - 736; Fungi - 347; Plants - 385; Viruses - 0; Other Eukaryotes - 339 (source: NCBI BLink). ,NA
733,AT3G28290,-1.148185845,-0.157511158,3.072439848,13.34948967,0.001262395,0.029803622, Protein of unknown function (DUF677) ,AT14A
734,AT3G28300,-1.148185867,-0.157511316,3.072439848,13.34939058,0.001262457,0.029803622, Protein of unknown function (DUF677) ,AT14A
735,AT1G25250,0.760821426,-0.268228733,2.640948814,13.34420434,0.001265735,0.029840352, indeterminate(ID)-domain 16 ,AtIDD16;IDD16
736,AT1G31770,0.508293349,0.22317517,2.829081593,13.32110943,0.001280436,0.030105596, ATP-binding cassette 14 ,ABCG14;AtABCG14
737,AT5G01210,-0.376055852,-0.201116695,4.011856934,13.3210706,0.001280461,0.030105596, HXXXD-type acyl-transferase family protein ,NA
738,AT2G40475,-0.386541094,-0.233981456,3.725001164,13.25331525,0.001324583,0.031100777, unknown protein; BEST Arabidopsis thaliana protein match is: unknown protein (TAIR:AT3G56260.2); Has 477 Blast hits to 219 proteins in 41 species: Archae - 0; Bacteria - 4; Metazoa - 91; Fungi - 61; Plants - 144; Viruses - 0; Other Eukaryotes - 177 (source: NCBI BLink). ,ASG8
739,AT4G20960,-0.249939316,-0.025968009,6.402214273,13.22693063,0.001342173,0.031471142, Cytidine/deoxycytidylate deaminase family protein ,PyrD
740,AT5G49840,0.23162526,-0.010761992,5.77688031,13.20246841,0.00135869,0.031815381, ATP-dependent Clp protease ,NA
741,AT5G11420,0.344304977,-0.138117112,5.803561542,13.19304988,0.001365104,0.031855666," Protein of unknown function, DUF642 ",NA
742,AT2G28800,-0.194303581,-0.027537626,9.345394267,13.19071628,0.001366697,0.031855666, 63 kDa inner membrane family protein ,ALB3
743,AT5G24850,0.307525733,0.068496555,3.778825425,13.1894099,0.00136759,0.031855666, cryptochrome 3 ,CRY3
744,AT4G37540,-0.354307605,1.149174026,2.810642955,13.1891559,0.001367764,0.031855666, LOB domain-containing protein 39 ,LBD39
745,AT4G19870,0.780083578,-0.177675339,2.687304667,13.17851475,0.001375061,0.031982621, Galactose oxidase/kelch repeat superfamily protein ,NA
746,AT5G48650,0.390361375,0.6697772,2.022358561,13.16581185,0.001383822,0.032140887, Nuclear transport factor 2 (NTF2) family protein with RNA binding (RRM-RBD-RNP motifs) domain ,NA
747,AT5G58620,-0.723328306,0.919290915,3.349893093,13.16328021,0.001385575,0.032140887, zinc finger (CCCH-type) family protein ,TZF9
748,AT1G21250,1.140683642,-0.877073116,3.623749017,13.15952975,0.001388176,0.032158165, cell wall-associated kinase ,AtWAK1;PRO25;WAK1
749,AT2G35990,-0.28329359,3.242514755,0.229203902,13.15521188,0.001391176,0.03218464, Putative lysine decarboxylase family protein ,LOG2
750,AT4G01690,-0.208240918,-0.025098432,7.292671132,13.15142293,0.001393814,0.032202677, Flavin containing amine oxidoreductase family ,HEMG1;PPO1;PPOX
751,AT2G35130,-0.374593788,0.043584173,4.409844205,13.14093708,0.001401141,0.032316104, Tetratricopeptide repeat (TPR)-like superfamily protein ,PPR_66
752,AT1G07070,-0.271463003,-0.170157842,5.307830894,13.13659799,0.001404184,0.032316104, Ribosomal protein L35Ae family protein ,NA
753,AT2G32950,0.36607522,-0.215762929,5.393621088,13.13640667,0.001404318,0.032316104, Transducin/WD40 repeat-like superfamily protein ,ATCOP1;COP1;DET340;EMB168;FUS1
754,AT1G26690,0.542042353,-0.322991049,4.136164516,13.12873857,0.001409713,0.032378928, emp24/gp25L/p24 family/GOLD family protein ,NA
755,AT2G42530,-0.889792929,0.621863732,6.827591296,13.12721729,0.001410785,0.032378928, cold regulated 15b ,COR15B
756,AT5G01810,0.21931718,0.130372933,6.132113324,13.11825058,0.001417125,0.032481399, CBL-interacting protein kinase 15 ,ATPK10;CIPK15;PKS3;SIP2;SNRK3.1
757,AT1G58370,-0.612590663,-0.002513298,3.266860641,13.11209873,0.00142149,0.032538423, glycosyl hydrolase family 10 protein / carbohydrate-binding domain-containing protein ,ATXYN1;RXF12
758,AT1G23380,0.43066487,0.532269958,2.395308072,13.1004934,0.001429763,0.0326444, KNOTTED1-like homeobox gene 6 ,KNAT6;KNAT6L;KNAT6S
759,AT5G06400,-1.029682487,0.445844092,1.563353575,13.09785084,0.001431653,0.0326444, Pentatricopeptide repeat (PPR) superfamily protein ,NA
760,AT1G33440,-0.526202061,-0.167284491,2.582676112,13.097685,0.001431772,0.0326444, Major facilitator superfamily protein ,AtNPF4.4;NPF4.4
761,AT3G44380,-0.565017337,0.118392839,3.200319747,13.09100571,0.001436562,0.032710562, Late embryogenesis abundant (LEA) hydroxyproline-rich glycoprotein family ,NA
762,AT3G04760,-0.269292557,0.046772051,7.177998133,13.08813305,0.001438626,0.03271459, Pentatricopeptide repeat (PPR-like) superfamily protein ,NA
763,AT1G23190,0.306999797,-0.160991569,6.011492076,13.0804669,0.001444151,0.032797188, Phosphoglucomutase/phosphomannomutase family protein ,PGM3
764,AT2G22450,-0.3178517,-0.004931717,4.973356641,13.06613699,0.001454536,0.032989785," riboflavin biosynthesis protein, putative ",AtRIBA2;RIBA2
765,AT1G65590,-0.101394512,-0.43829167,4.083136159,13.05772472,0.001460667,0.033085531, beta-hexosaminidase 3 ,ATHEX1;HEXO3
766,AT3G12965,-0.46499011,-0.076634663,4.617865437,13.05065717,0.001465837,0.033159309, other RNA ,sORF23
767,AT2G15000,-0.455868167,0.075287189,5.33679222,13.04372908,0.001470924,0.033230991, unknown protein; FUNCTIONS IN: molecular_function unknown; INVOLVED IN: biological_process unknown; LOCATED IN: chloroplast; EXPRESSED IN: 22 plant structures; EXPRESSED DURING: 13 growth stages; BEST Arabidopsis thaliana protein match is: unknown protein (TAIR:AT4G34265.2); Has 80 Blast hits to 80 proteins in 11 species: Archae - 0; Bacteria - 0; Metazoa - 0; Fungi - 0; Plants - 80; Viruses - 0; Other Eukaryotes - 0 (source: NCBI BLink). ,NA
768,AT4G38200,0.340483888,-0.109254838,5.275004007,13.0395361,0.001474011,0.033257372, SEC7-like guanine nucleotide exchange family protein ,BIG1
769,AT1G60000,-0.15574025,-0.181554393,6.12543938,13.0056729,0.001499181,0.033781281, RNA-binding (RRM/RBD/RNP motifs) family protein ,NA
770,AT1G32780,-0.915352178,0.226967153,2.100009013,12.99950464,0.001503812,0.033841388, GroES-like zinc-binding dehydrogenase family protein ,NA
771,AT3G21030,-0.638140308,-0.115247376,2.1033367,12.99692262,0.001505754,0.033841388, transposable element gene ,NA
772,AT3G50700,-0.491581542,-0.030992949,4.152880616,12.98220869,0.001516873,0.034033366, indeterminate(ID)-domain 2 ,AtIDD2;IDD2
773,AT1G22630,-0.188266045,-0.304052708,5.032403707,12.98042762,0.001518224,0.034033366, unknown protein; LOCATED IN: chloroplast; EXPRESSED IN: 21 plant structures; EXPRESSED DURING: 13 growth stages; Has 87 Blast hits to 86 proteins in 34 species: Archae - 0; Bacteria - 13; Metazoa - 27; Fungi - 0; Plants - 40; Viruses - 0; Other Eukaryotes - 7 (source: NCBI BLink). ,NA
774,AT1G55325,0.292837126,0.072340727,5.061700554,12.97439634,0.00152281,0.034049256, RNA polymerase II transcription mediators ,GCT;MAB2;MED13
775,AT5G24490,-0.274820116,-0.09340916,9.454942264,12.97432606,0.001522863,0.034049256," 30S ribosomal protein, putative ",NA
776,AT1G19370,-0.377752856,0.035808197,4.515179365,12.96215275,0.001532161,0.034172731, unknown protein; LOCATED IN: endoplasmic reticulum; EXPRESSED IN: 22 plant structures; EXPRESSED DURING: 13 growth stages; BEST Arabidopsis thaliana protein match is: unknown protein (TAIR:AT1G75140.1); Has 45 Blast hits to 43 proteins in 15 species: Archae - 0; Bacteria - 0; Metazoa - 0; Fungi - 0; Plants - 44; Viruses - 0; Other Eukaryotes - 1 (source: NCBI BLink). ,NA
777,AT3G42658,-0.104452261,4.409438884,3.819538624,12.96088156,0.001533135,0.034172731, transposable element gene ,SADHU3-2
778,AT3G51000,0.618194211,-0.588660638,3.586034342,12.95935947,0.001534302,0.034172731, alpha/beta-Hydrolases superfamily protein ,NA
779,AT3G49220,0.274690039,-0.139101139,6.765523653,12.94106937,0.001548398,0.034423769, Plant invertase/pectin methylesterase inhibitor superfamily ,PME34
780,AT4G12420,-0.207208503,-0.007927094,6.833842354,12.93958606,0.001549546,0.034423769, Cupredoxin superfamily protein ,SKU5
781,AT5G46780,-0.647129303,0.238363514,3.662726422,12.93372493,0.001554094,0.034444695, VQ motif-containing protein ,NA
782,AT2G47500,0.211157644,0.044562269,6.380066162,12.93314367,0.001554546,0.034444695, P-loop nucleoside triphosphate hydrolases superfamily protein with CH (Calponin Homology) domain ,NA
783,AT4G35240,0.025723533,0.370852222,5.568124486,12.93069313,0.001556452,0.034444695, Protein of unknown function (DUF630 and DUF632) ,NA
784,AT2G29760,-0.365768362,0.024012394,4.21992935,12.92577856,0.001560281,0.034485397, Tetratricopeptide repeat (TPR)-like superfamily protein ,OTP81;QED1
785,AT3G04720,1.654389866,-1.37593452,1.246486168,12.91771945,0.001566581,0.034548774, pathogenesis-related 4 ,AtPR4;HEL;PR-4;PR4
786,AT5G07690,-0.419582503,0.138583669,4.763840556,12.91701079,0.001567136,0.034548774, myb domain protein 29 ,ATMYB29;MYB29;PMG2;RAO7
787,AT4G18400,-0.269492547,1.472133729,1.647275953,12.91234872,0.001570794,0.034563226, unknown protein; FUNCTIONS IN: molecular_function unknown; INVOLVED IN: biological_process unknown; LOCATED IN: chloroplast; EXPRESSED IN: 22 plant structures; EXPRESSED DURING: 13 growth stages; Has 30201 Blast hits to 17322 proteins in 780 species: Archae - 12; Bacteria - 1396; Metazoa - 17338; Fungi - 3422; Plants - 5037; Viruses - 0; Other Eukaryotes - 2996 (source: NCBI BLink). ,NA
788,AT1G14520,-0.686792228,-0.138126046,1.84190719,12.91060282,0.001572165,0.034563226, myo-inositol oxygenase 1 ,MIOX1
789,AT2G28720,-0.67655373,0.424084743,6.869750652,12.90855528,0.001573776,0.034563226, Histone superfamily protein ,NA
790,AT5G38980,-0.315125357,-0.186585215,4.339355183,12.87132649,0.001603345,0.035168052, unknown protein; FUNCTIONS IN: molecular_function unknown; INVOLVED IN: biological_process unknown; LOCATED IN: endomembrane system; EXPRESSED IN: 22 plant structures; EXPRESSED DURING: 13 growth stages; Has 3 Blast hits to 3 proteins in 1 species: Archae - 0; Bacteria - 0; Metazoa - 0; Fungi - 0; Plants - 3; Viruses - 0; Other Eukaryotes - 0 (source: NCBI BLink). ,NA
791,AT5G23820,-0.26657713,-0.36503693,5.529248838,12.85653236,0.001615249,0.03534809, MD-2-related lipid recognition domain-containing protein ,ML3
792,AT3G57500,-0.943503091,0.262285587,1.977417909,12.85605697,0.001615633,0.03534809, unknown protein; BEST Arabidopsis thaliana protein match is: unknown protein (TAIR:AT2G26520.1); Has 51 Blast hits to 51 proteins in 11 species: Archae - 0; Bacteria - 1; Metazoa - 0; Fungi - 0; Plants - 50; Viruses - 0; Other Eukaryotes - 0 (source: NCBI BLink). ,NA
793,AT1G14810,-0.309012224,0.11213395,7.625697832,12.85019586,0.001620375,0.035392931, semialdehyde dehydrogenase family protein ,NA
794,AT4G37430,0.630516094,-0.016396773,3.518354693,12.84707033,0.001622909,0.035392931," cytochrome P450, family 91, subfamily A, polypeptide 2 ",CYP81F1;CYP91A2
795,AT1G08800,-0.101525026,-0.853535386,2.673952968,12.84596004,0.00162381,0.035392931," Protein of unknown function, DUF593 ",MyoB1
796,AT4G08380,1.131482953,0.271183298,2.171084521,12.83820179,0.001630121,0.035485855, Proline-rich extensin-like family protein ,NA
797,AT5G08410,-0.279276342,-0.127300521,6.115884855,12.83023986,0.001636624,0.035582703, ferredoxin/thioredoxin reductase subunit A (variable subunit) 2 ,FTRA2
798,AT1G80920,-0.364614446,-0.178911746,4.832645339,12.82455013,0.001641286,0.035639358, Chaperone DnaJ-domain superfamily protein ,AtJ8;AtToc12;DJC22;J8;Toc12
799,AT5G13650,-0.233977683,0.023432142,8.578114133,12.81796207,0.001646702,0.035712197, elongation factor family protein ,SVR3
800,AT2G04530,-0.317058159,-0.003170257,5.53065996,12.76828207,0.001688118,0.036564634, Metallo-hydrolase/oxidoreductase superfamily protein ,CPZ;TRZ2
801,AT2G47400,-0.285675939,0.001425124,11.40637734,12.76310756,0.001692491,0.036597436, CP12 domain-containing protein 1 ,CP12;CP12-1
802,AT2G36620,-0.372319893,0.143224122,9.696550824,12.76149492,0.001693856,0.036597436, ribosomal protein L24 ,RPL24A
803,AT3G45260,-0.328018179,-0.145954878,4.538298219,12.75217776,0.001701766,0.036722537, C2H2-like zinc finger protein ,BIB
804,AT1G18180,0.961591078,-0.235401153,2.092092476,12.74814771,0.001705198,0.036750841, Protein of unknown function (DUF1295) ,NA
805,AT3G44690,0.442295289,0.310490436,2.34699552,12.73698444,0.001714743,0.036910636, unknown protein; Has 30201 Blast hits to 17322 proteins in 780 species: Archae - 12; Bacteria - 1396; Metazoa - 17338; Fungi - 3422; Plants - 5037; Viruses - 0; Other Eukaryotes - 2996 (source: NCBI BLink). ,NA
806,AT1G62600,0.443471116,-0.125100867,3.796023017,12.72769373,0.001722727,0.03703649, Flavin-binding monooxygenase family protein ,NA
807,AT1G15950,0.200169936,0.082198642,5.978213519,12.72006381,0.001729312,0.037131983, cinnamoyl coa reductase 1 ,ATCCR1;CCR1;IRX4
808,AT3G27770,-0.181564263,-0.209416068,5.58496382,12.71641984,0.001732465,0.037153659, unknown protein; FUNCTIONS IN: molecular_function unknown; INVOLVED IN: biological_process unknown; LOCATED IN: endomembrane system; EXPRESSED IN: 22 plant structures; EXPRESSED DURING: 13 growth stages; BEST Arabidopsis thaliana protein match is: unknown protein (TAIR:AT5G62960.1); Has 158 Blast hits to 157 proteins in 21 species: Archae - 0; Bacteria - 0; Metazoa - 13; Fungi - 0; Plants - 141; Viruses - 0; Other Eukaryotes - 4 (source: NCBI BLink). ,NA
809,AT1G58848,0.187219128,0.064962269,7.185048098,12.70677951,0.001740836,0.037287031, Disease resistance protein (CC-NBS-LRR class) family ,NA
810,AT1G73090,-0.511255278,0.239649655,3.823922553,12.67301329,0.001770476,0.037875079, unknown protein; FUNCTIONS IN: molecular_function unknown; INVOLVED IN: biological_process unknown; EXPRESSED IN: 21 plant structures; EXPRESSED DURING: 12 growth stages. ,NA
811,AT4G20690,-1.644961334,0.463341521,0.843046343,12.65457775,0.001786872,0.038178683, unknown protein; Has 86 Blast hits to 20 proteins in 1 species: Archae - 0; Bacteria - 0; Metazoa - 0; Fungi - 0; Plants - 86; Viruses - 0; Other Eukaryotes - 0 (source: NCBI BLink). ,NA
812,AT2G43590,0.273749972,0.342480419,4.545361984,12.63942168,0.001800464,0.038421725, Chitinase family protein ,NA
813,AT5G40540,-1.246304964,0.599856117,1.160859649,12.61960238,0.001818395,0.038756634, Protein kinase superfamily protein ,NA
814,AT1G20450,-0.316906457,0.078958623,7.383123952,12.61338117,0.00182406,0.038789556, Dehydrin family protein ,ERD10;LTI29;LTI45
815,AT5G64910,0.642851531,0.005772675,2.633372863,12.61299021,0.001824416,0.038789556, unknown protein; BEST Arabidopsis thaliana protein match is: unknown protein (TAIR:AT5G10010.1); Has 1807 Blast hits to 1807 proteins in 277 species: Archae - 0; Bacteria - 0; Metazoa - 736; Fungi - 347; Plants - 385; Viruses - 0; Other Eukaryotes - 339 (source: NCBI BLink). ,NA
816,AT1G08180,-1.541948183,1.747981012,1.285645434,12.60378285,0.001832835,0.038920787, unknown protein; Has 53 Blast hits to 53 proteins in 9 species: Archae - 0; Bacteria - 0; Metazoa - 1; Fungi - 0; Plants - 52; Viruses - 0; Other Eukaryotes - 0 (source: NCBI BLink). ,SMR2
817,AT4G14740,-0.288936412,0.035804078,5.372998546,12.58948185,0.001845987,0.039152107, Plant protein of unknown function (DUF828) with plant pleckstrin homology-like region ,NA
818,AT1G18000,6.986619402,-11.9107064,0.799725024,12.58050812,0.001854289,0.039280093, Major facilitator superfamily protein ,NA
819,AT3G02330,-0.874544493,1.20431484,2.620810464,12.5649146,0.001868803,0.039539211, Pentatricopeptide repeat (PPR) superfamily protein ,MEF13
820,AT3G50380,0.355224909,-0.00576038,5.521395026,12.55782272,0.001875441,0.039631274, Protein of unknown function (DUF1162) ,NA
821,AT2G46600,1.207027205,-1.161300081,2.228818025,12.54563175,0.001886908,0.039825016, Calcium-binding EF-hand family protein ,NA
822,AT4G18130,0.345146112,-0.17412789,5.124397751,12.52433018,0.001907112,0.040202483, phytochrome E ,PHYE
823,ATCG00820,-0.593686453,0.87570195,5.369879318,12.5180083,0.00191315,0.040266266, ribosomal protein S19 ,RPS19
824,AT4G27960,-0.200113471,-0.199605621,4.372361919,12.51629933,0.001914786,0.040266266, ubiquitin conjugating enzyme 9 ,UBC9
825,AT4G13410,-0.857924684,0.121052539,1.961912548,12.47907616,0.001950756,0.040972978, Nucleotide-diphospho-sugar transferases superfamily protein ,ATCSLA15;CSLA15
826,AT5G48900,-0.157979078,-0.254953973,4.077708793,12.47600522,0.001953754,0.040986259, Pectin lyase-like superfamily protein ,NA
827,AT5G19310,0.096837333,0.314206717,5.320492649,12.46541237,0.001964129,0.041154092, Homeotic gene regulator ,AtCHR23;CHR23
828,AT1G02080,0.259818196,-0.058652532,6.556163804,12.45648088,0.00197292,0.041288361, transcription regulators ,NA
829,AT1G09420,0.666005314,-0.323658382,2.994588726,12.4467833,0.00198251,0.041396543, glucose-6-phosphate dehydrogenase 4 ,G6PD4
830,AT3G48190,0.189674839,0.156700831,5.645168539,12.44642233,0.001982868,0.041396543, ataxia-telangiectasia mutated ,ATATM;ATM;PIG1
831,AT2G01990,-1.312460231,0.768912913,1.312478163,12.43875836,0.001990481,0.041505472, unknown protein; BEST Arabidopsis thaliana protein match is: unknown protein (TAIR:AT1G14630.1); Has 118 Blast hits to 118 proteins in 14 species: Archae - 0; Bacteria - 0; Metazoa - 0; Fungi - 0; Plants - 118; Viruses - 0; Other Eukaryotes - 0 (source: NCBI BLink). ,NA
832,AT1G33110,0.355343517,-0.036994235,4.795532023,12.41535283,0.002013912,0.04194215, MATE efflux family protein ,NA
833,AT1G11850,-0.360244192,-0.066404706,4.521033124,12.41301861,0.002016263,0.04194215, unknown protein; FUNCTIONS IN: molecular_function unknown; INVOLVED IN: biological_process unknown; LOCATED IN: endomembrane system; EXPRESSED IN: 19 plant structures; EXPRESSED DURING: 12 growth stages; Has 84259 Blast hits to 16502 proteins in 1194 species: Archae - 107; Bacteria - 41190; Metazoa - 21798; Fungi - 3523; Plants - 7569; Viruses - 886; Other Eukaryotes - 9186 (source: NCBI BLink). ,NA
834,AT1G35420,-0.156695374,-0.119160797,6.467957612,12.40373336,0.002025646,0.042086801, alpha/beta-Hydrolases superfamily protein ,NA
835,AT1G65150,0.409947927,0.798698987,1.507858081,12.39638881,0.002033098,0.04219105, TRAF-like family protein ,NA
836,AT4G15545,-0.158464101,-0.155521745,6.743135368,12.39090793,0.002038678,0.042256225, unknown protein; BEST Arabidopsis thaliana protein match is: unknown protein (TAIR:AT1G16520.1); Has 30201 Blast hits to 17322 proteins in 780 species: Archae - 12; Bacteria - 1396; Metazoa - 17338; Fungi - 3422; Plants - 5037; Viruses - 0; Other Eukaryotes - 2996 (source: NCBI BLink). ,NA
837,AT3G46450,0.323159887,0.176506954,4.154528808,12.38430032,0.002045424,0.042345409, SEC14 cytosolic factor family protein / phosphoglyceride transfer family protein ,NA
838,AT1G22190,-0.485797838,-0.086388982,3.078535174,12.36888678,0.002061249,0.042622094, Integrase-type DNA-binding superfamily protein ,RAP2.4;WIND2
839,AT3G45050,-0.20142942,-0.238724588,4.486395236,12.36441439,0.002065863,0.042666597, unknown protein; FUNCTIONS IN: molecular_function unknown; INVOLVED IN: biological_process unknown; LOCATED IN: chloroplast; EXPRESSED IN: 22 plant structures; EXPRESSED DURING: 13 growth stages; Has 28 Blast hits to 28 proteins in 12 species: Archae - 0; Bacteria - 2; Metazoa - 0; Fungi - 0; Plants - 26; Viruses - 0; Other Eukaryotes - 0 (source: NCBI BLink). ,NA
840,AT2G37420,0.314904088,-0.031271345,5.146549949,12.35905581,0.002071406,0.042730137, ATP binding microtubule motor family protein ,NA
841,AT5G54470,0.334046113,0.15730385,3.951658971,12.34594807,0.002085026,0.042959961, B-box type zinc finger family protein ,BBX29
842,AT5G40910,0.389435577,-0.269429972,4.978860393,12.33721534,0.00209415,0.043096706, Disease resistance protein (TIR-NBS-LRR class) family ,NA
843,AT4G02330,0.903703331,-0.085568806,1.879291714,12.32217665,0.002109956,0.043354307, Plant invertase/pectin methylesterase inhibitor superfamily ,AtPME41;ATPMEPCRB;PME41
844,AT5G52420,-0.50275216,0.349865066,4.560530612,12.32055142,0.002111671,0.043354307, unknown protein; FUNCTIONS IN: molecular_function unknown; INVOLVED IN: biological_process unknown; LOCATED IN: endoplasmic reticulum; EXPRESSED IN: 24 plant structures; EXPRESSED DURING: 13 growth stages; BEST Arabidopsis thaliana protein match is: unknown protein (TAIR:AT5G23920.1); Has 30201 Blast hits to 17322 proteins in 780 species: Archae - 12; Bacteria - 1396; Metazoa - 17338; Fungi - 3422; Plants - 5037; Viruses - 0; Other Eukaryotes - 2996 (source: NCBI BLink). ,PRCE3
845,AT4G31210,-0.26932505,-0.005263907,6.867710269,12.31008809,0.002122747,0.04353014," DNA topoisomerase, type IA, core ",NA
846,AT4G04740,0.603734295,-0.570538314,3.592783317,12.30697723,0.002126052,0.043546367, calcium-dependent protein kinase 23 ,ATCPK23;CPK23
847,AT5G26742,-0.281926321,0.13546626,9.969071375,12.30236676,0.002130959,0.043595336, DEAD box RNA helicase (RH3) ,AtRH3;emb1138;RH3
848,AT5G02450,-0.241988104,-0.014833733,9.164878359,12.29141581,0.002142659,0.043783004, Ribosomal protein L36e family protein ,NA
849,AT5G39790,-0.192068268,-0.329624598,3.905298253,12.28320511,0.002151473,0.043911336, 5'-AMP-activated protein kinase-related ,PTST
850,AT2G10940,-0.31642557,-0.089942727,11.36856658,12.26487965,0.002171277,0.044263397, Bifunctional inhibitor/lipid-transfer protein/seed storage 2S albumin superfamily protein ,NA
851,AT4G16990,0.373281359,-0.220897025,7.383882148,12.25985383,0.00217674,0.044322622," disease resistance protein (TIR-NBS class), putative ",RLM3
852,AT4G21940,0.114500235,0.685251735,2.965937538,12.25146263,0.002185892,0.044416193, calcium-dependent protein kinase 15 ,CPK15
853,AT1G24793,-2.421195512,-2.528956458,0.163956526,12.25039535,0.002187059,0.044416193, UDP-3-O-acyl N-acetylglycosamine deacetylase family protein ,AtLpxC1;LpxC1
854,AT3G16460,0.558592696,0.042909065,4.142386243,12.24859789,0.002189025,0.044416193, Mannose-binding lectin superfamily protein ,JAL34
855,AT3G23080,-0.194815009,-0.051425511,6.684377137,12.23473778,0.002204248,0.044672759, Polyketide cyclase/dehydrase and lipid transport superfamily protein ,NA
856,AT1G23130,-0.238565347,-0.411600466,5.889657586,12.21461101,0.002226542,0.045071872, Polyketide cyclase/dehydrase and lipid transport superfamily protein ,NA
857,AT5G06340,-0.240752294,-0.008434572,5.857517933,12.19280394,0.002250952,0.045492163, nudix hydrolase homolog 27 ,ATNUDX27;NUDX27
858,AT3G45140,-0.722033106,-0.126089291,7.538794729,12.19138017,0.002252555,0.045492163, lipoxygenase 2 ,ATLOX2;LOX2
859,AT1G15140,-0.223281196,-0.041141622,6.917718437,12.1788854,0.002266672,0.045621192, FAD/NAD(P)-binding oxidoreductase ,FNRL
860,AT4G34060,-0.774197239,-0.349730999,1.66355916,12.17884821,0.002266714,0.045621192, demeter-like protein 3 ,DML3
861,AT5G01660,0.78303796,-0.024370412,2.056464896,12.17873481,0.002266842,0.045621192," CONTAINS InterPro DOMAIN/s: Galactose oxidase/kelch, beta-propeller (InterPro:IPR011043), Kelch repeat type 1 (InterPro:IPR006652), Development/cell death domain (InterPro:IPR013989), Kelch related (InterPro:IPR013089), Kelch-type beta propeller (InterPro:IPR015915); BEST Arabidopsis thaliana protein match is: DCD (Development and Cell Death) domain protein (TAIR:AT3G11000.1); Has 16133 Blast hits to 7053 proteins in 482 species: Archae - 40; Bacteria - 1227; Metazoa - 10756; Fungi - 311; Plants - 1896; Viruses - 673; Other Eukaryotes - 1230 (source: NCBI BLink). ",NA
862,AT5G14970,-0.336231828,0.032095259,5.686854591,12.17416201,0.002272031,0.045666279, unknown protein; BEST Arabidopsis thaliana protein match is: unknown protein (TAIR:AT2G14910.1); Has 579 Blast hits to 397 proteins in 95 species: Archae - 0; Bacteria - 294; Metazoa - 0; Fungi - 0; Plants - 86; Viruses - 0; Other Eukaryotes - 199 (source: NCBI BLink). ,NA
863,AT5G38420,-0.215714826,-0.146174718,9.268555411,12.16795012,0.002279099,0.045666279, Ribulose bisphosphate carboxylase (small chain) family protein ,RBCS2B
864,AT2G20590,0.374770289,-0.043436893,3.996212638,12.16759735,0.002279501,0.045666279, Reticulon family protein ,RTN17
865,AT5G51110,-0.255372778,0.035805326,7.308445077,12.16522154,0.002282211,0.045666279, Transcriptional coactivator/pterin dehydratase ,ATP1;RAF2;SDIRIP1
866,AT5G20050,-0.44508989,0.214077433,4.169617911,12.16517837,0.00228226,0.045666279, Protein kinase superfamily protein ,NA
867,AT3G51280,0.149376161,0.194762612,6.450812982,12.15692374,0.002291699,0.045802259, Tetratricopeptide repeat (TPR)-like superfamily protein ,NA
868,AT1G03230,-0.456037108,-0.008212334,5.346548626,12.13830325,0.002313135,0.046177419, Eukaryotic aspartyl protease family protein ,NA
869,AT1G61140,0.178570859,0.196394944,4.414521393,12.13285273,0.002319447,0.046211528, SNF2 domain-containing protein / helicase domain-containing protein / zinc finger protein-related ,EDA16;FRG4
870,AT3G58050,0.323124028,-0.000208968,4.974317677,12.13222347,0.002320177,0.046211528, unknown protein; BEST Arabidopsis thaliana protein match is: unknown protein (TAIR:AT2G41960.1); Has 13384 Blast hits to 8116 proteins in 546 species: Archae - 41; Bacteria - 766; Metazoa - 5596; Fungi - 1431; Plants - 589; Viruses - 46; Other Eukaryotes - 4915 (source: NCBI BLink). ,NA
871,AT1G49975,-0.402666645,0.19805495,4.94736326,12.12617828,0.002327201,0.046298202," INVOLVED IN: photosynthesis; LOCATED IN: photosystem I, chloroplast, thylakoid membrane; EXPRESSED IN: 20 plant structures; EXPRESSED DURING: 13 growth stages; CONTAINS InterPro DOMAIN/s: Photosystem I reaction centre subunit N (InterPro:IPR008796); Has 34 Blast hits to 34 proteins in 14 species: Archae - 0; Bacteria - 0; Metazoa - 0; Fungi - 0; Plants - 34; Viruses - 0; Other Eukaryotes - 0 (source: NCBI BLink). ",NA
872,AT2G24645,0.067786847,0.548437184,3.476416044,12.12317245,0.002330701,0.046314663, Transcriptional factor B3 family protein ,NA
873,AT1G31540,0.58943787,-0.180646407,3.917657158,12.09277714,0.002366393,0.04692155, Disease resistance protein (TIR-NBS-LRR class) family ,NA
874,AT5G23575,-0.316905759,0.119615907,5.489400753,12.0918856,0.002367448,0.04692155, Transmembrane CLPTM1 family protein ,NA
875,AT3G20975,-2.090396583,1.790624752,1.685179566,12.09026662,0.002369365,0.04692155, transposable element gene ,NA
876,AT5G35790,-0.240388351,0.03157812,7.548466296,12.0804686,0.002381001,0.047098156, glucose-6-phosphate dehydrogenase 1 ,G6PD1
877,AT3G02500,-0.946114489,1.062339251,2.722206605,12.07491034,0.002387627,0.047175377, unknown protein; BEST Arabidopsis thaliana protein match is: unknown protein (TAIR:AT5G16030.1); Has 49 Blast hits to 49 proteins in 10 species: Archae - 0; Bacteria - 0; Metazoa - 0; Fungi - 0; Plants - 49; Viruses - 0; Other Eukaryotes - 0 (source: NCBI BLink). ,NA
878,AT5G27630,0.979831971,-0.885881133,2.335162954,12.06698912,0.002397103,0.047286112, acyl-CoA binding protein 5 ,ACBP5;AtACBP5
879,AT4G36220,-0.236408925,-0.027036341,6.040045252,12.06566544,0.00239869,0.047286112, ferulic acid 5-hydroxylase 1 ,CYP84A1;FAH1
880,AT5G62070,0.388019403,-0.06827632,3.88901265,12.05625719,0.00241,0.047455088, IQ-domain 23 ,IQD23
881,AT1G74420,0.580712683,0.719759974,1.39086257,12.05191994,0.002415232,0.04750413, fucosyltransferase 3 ,ATFUT3;FUT3
882,AT1G64440,0.779470182,-0.616611566,3.712767899,12.03239252,0.002438929,0.04791583, NAD(P)-binding Rossmann-fold superfamily protein ,REB1;RHD1;UGE4
883,AT1G79280,0.164247679,0.099206004,8.20204972,12.01435376,0.002461026,0.048295199, nuclear pore anchor ,AtTPR;NUA
884,AT1G09780,0.235039939,0.018343339,6.611917581,11.99111437,0.002489789,0.048804377," Phosphoglycerate mutase, 2,3-bisphosphoglycerate-independent ",iPGAM1
885,AT3G62570,-0.354902152,2.417612671,1.044029276,11.98645093,0.002495602,0.048863033, Tetratricopeptide repeat (TPR)-like superfamily protein ,NA
886,AT3G13150,-0.75029794,0.418218295,2.978842634,11.97936343,0.002504461,0.048981153, Tetratricopeptide repeat (TPR)-like superfamily protein ,NA
887,AT4G22490,-0.538165002,0.227188221,4.469708402,11.96044129,0.002528268,0.04939102, Bifunctional inhibitor/lipid-transfer protein/seed storage 2S albumin superfamily protein ,NA
888,AT4G29990,0.203759469,1.043507529,1.903397528,11.95628655,0.002533526,0.049437994, Leucine-rich repeat transmembrane protein kinase protein ,NA
889,AT2G44040,-0.31187787,0.01053414,5.306270398,11.94487727,0.00254802,0.049614784," Dihydrodipicolinate reductase, bacterial/plant ",NA
890,AT5G28490,0.504973559,-0.120868181,3.688498799,11.94464786,0.002548312,0.049614784, Protein of unknown function (DUF640) ,LSH1;OBO2
891,ATCG01180,-1.449188252,1.337305123,12.56887455,11.93865511,0.00255596,0.049653219, chloroplast-encoded 23S ribosomal RNA ,RRN23S.2
892,ATCG00950,-1.449188252,1.337305123,12.56887455,11.93860977,0.002556018,0.049653219, chloroplast-encoded 23S ribosomal RNA ,RRN23S.1
893,AT1G01970,-0.195881569,-0.072556005,5.675716635,11.92420708,0.002574491,0.049956075, Tetratricopeptide repeat (TPR)-like superfamily protein ,NA
